# Supplementary material for: Designing a high-resolution, LEGO-based microscope for an educational setting
Source: bioRxiv or medRxiv preprint supplement (doi:10.1101/2021.04.11.439311), 2021-04-11

1

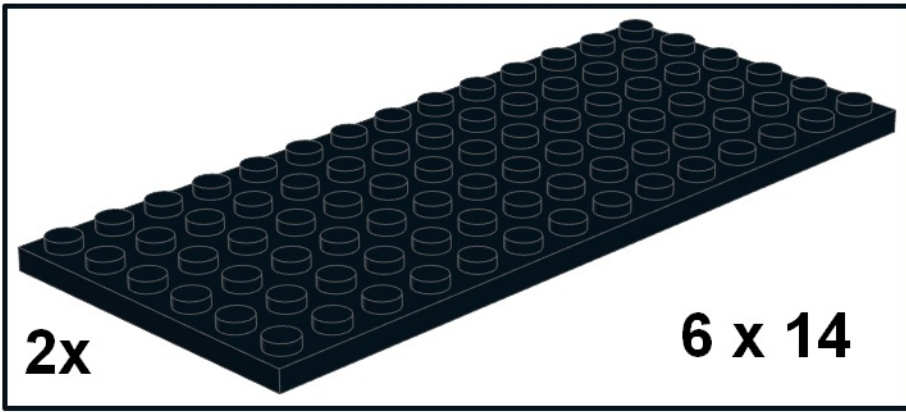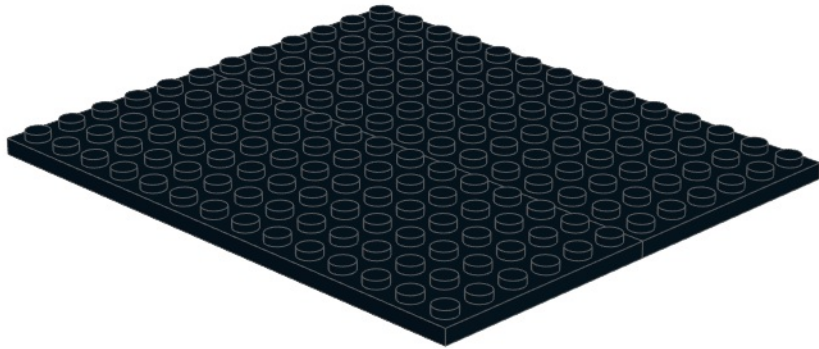

2

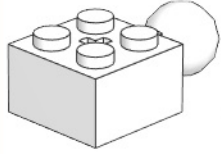

1x

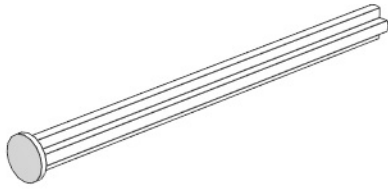

1x

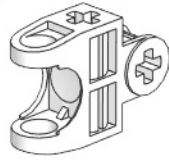

1x

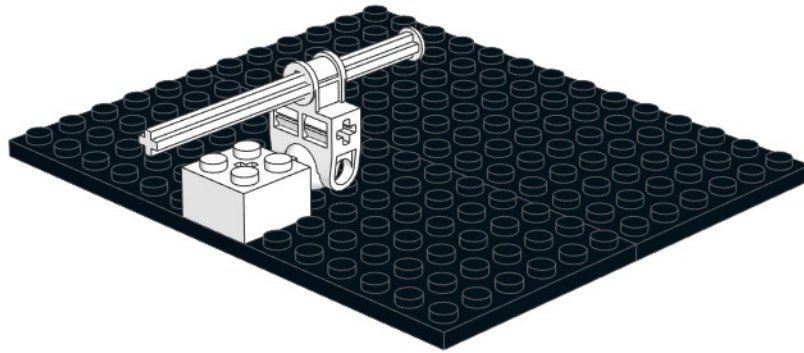

**3**

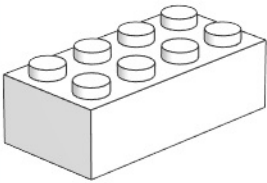

**2x**

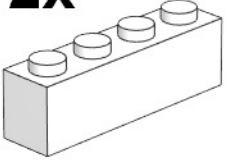

**2x**

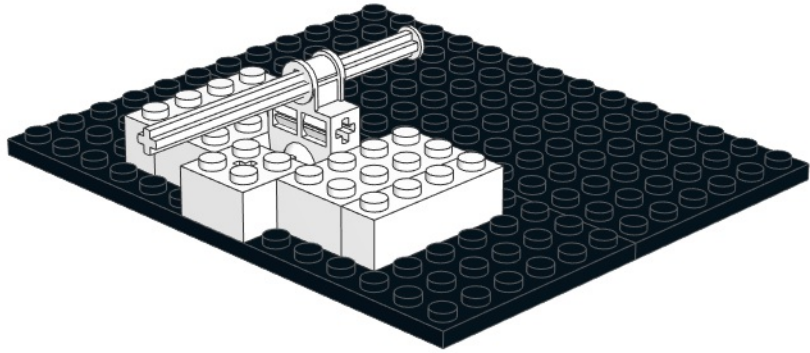

4

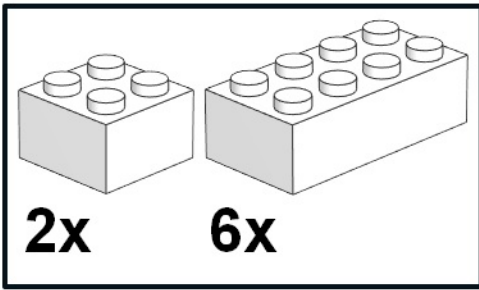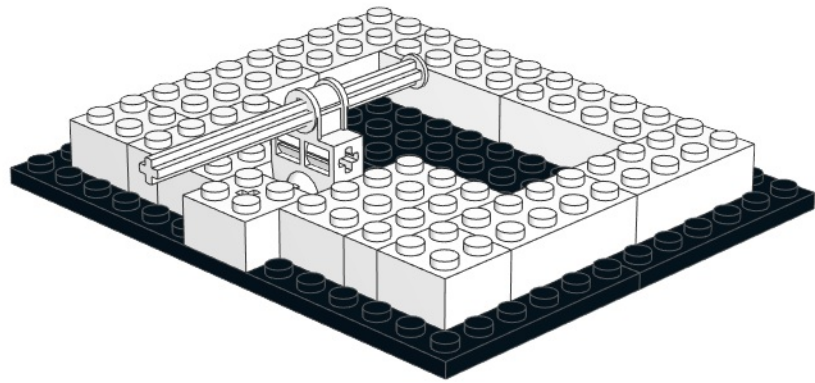

**5**

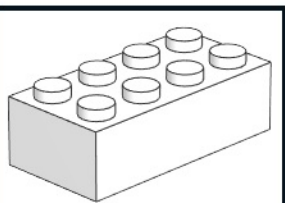

**9x**

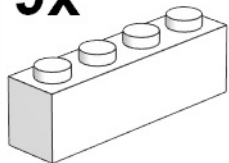

**2x**

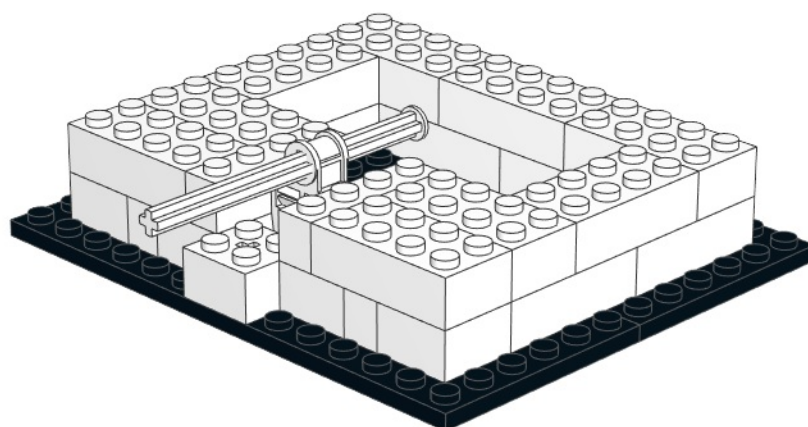

6

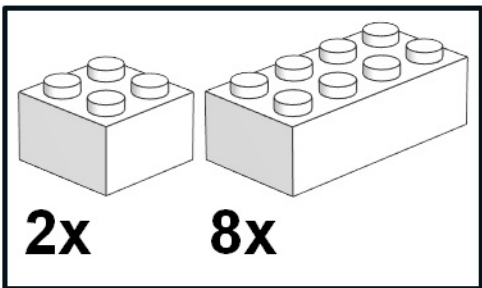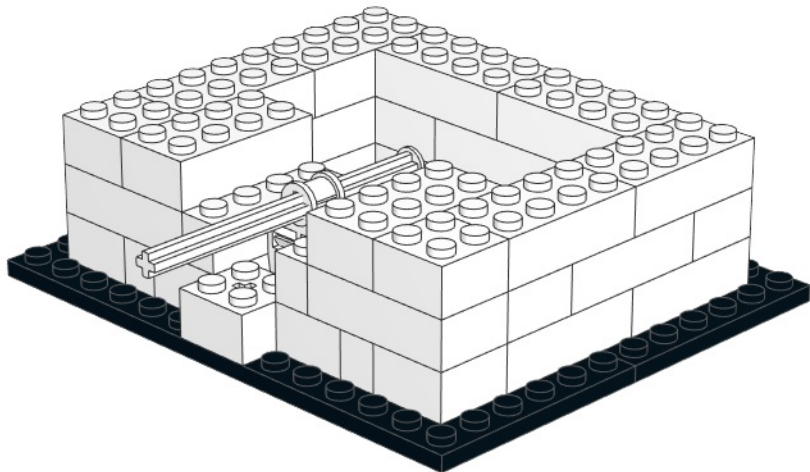

7

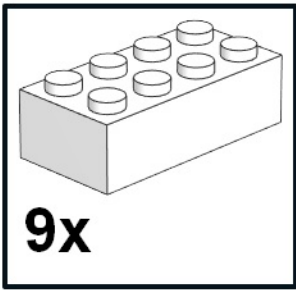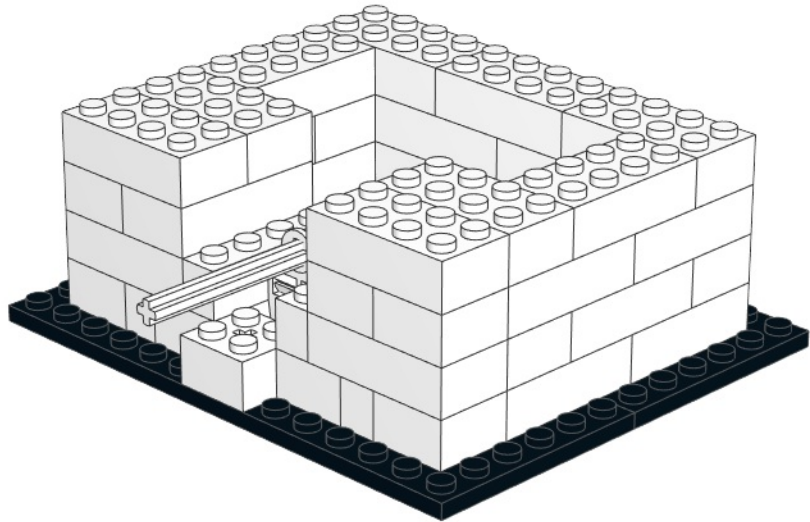

8

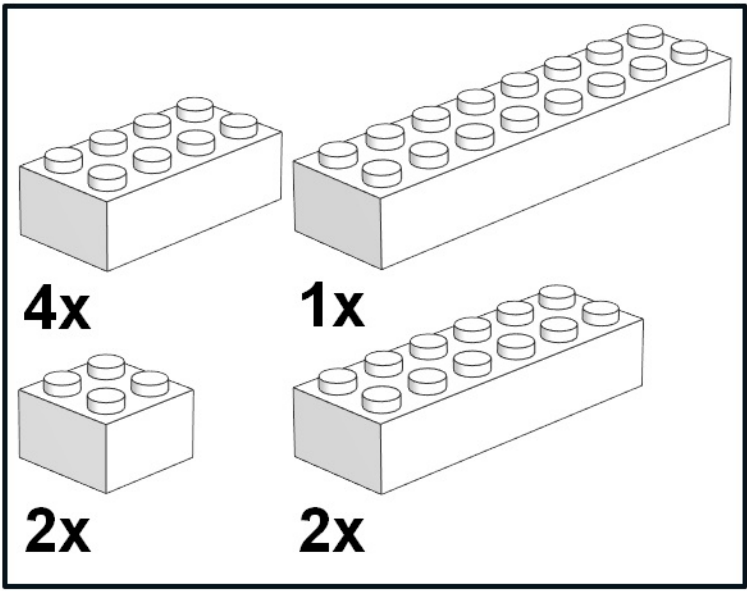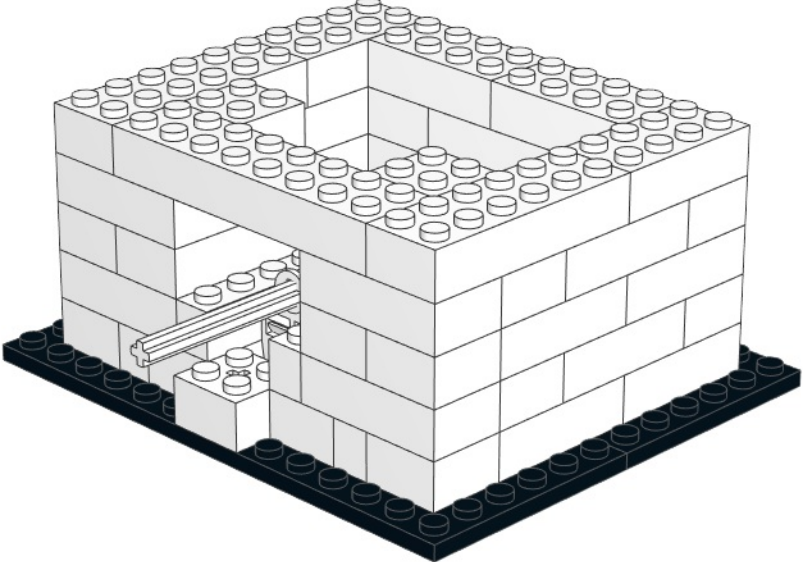



9

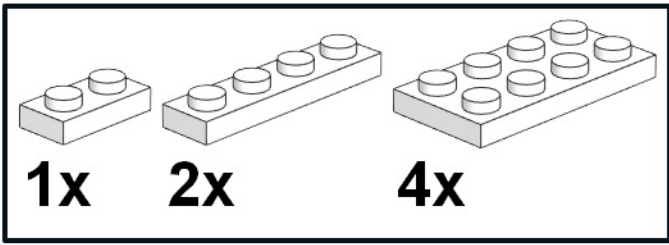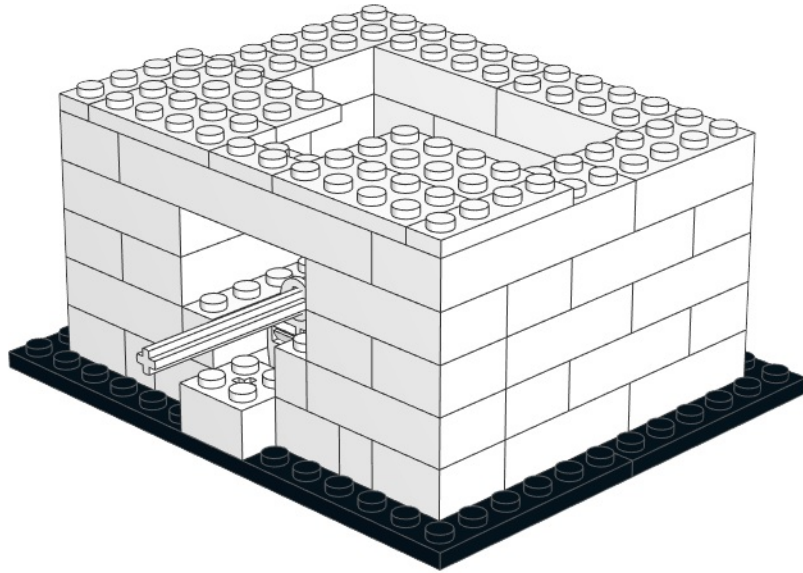

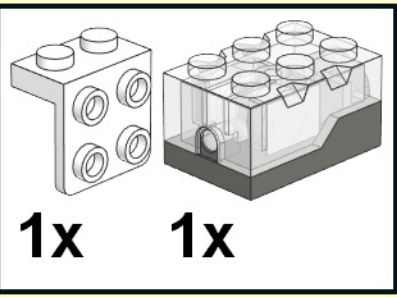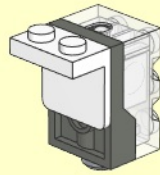

10

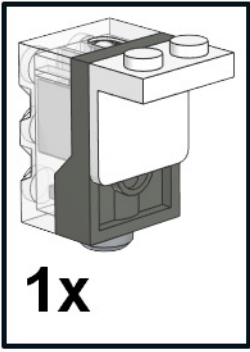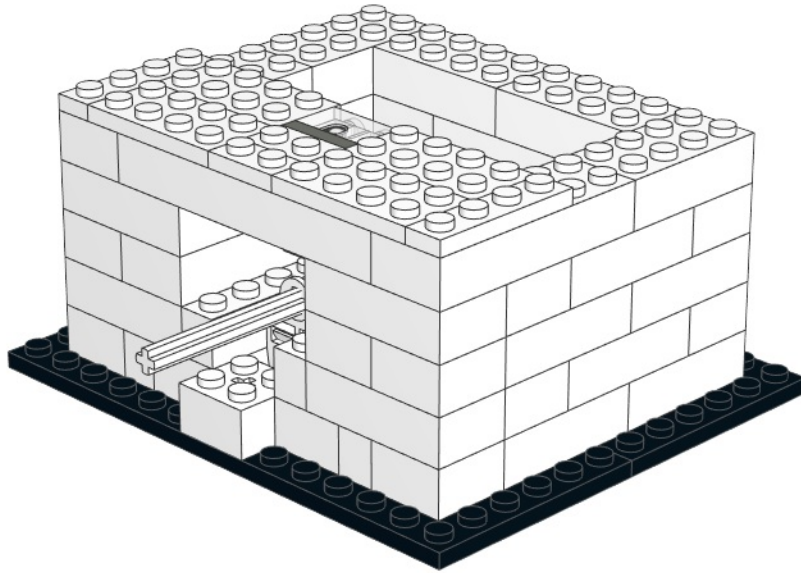

11

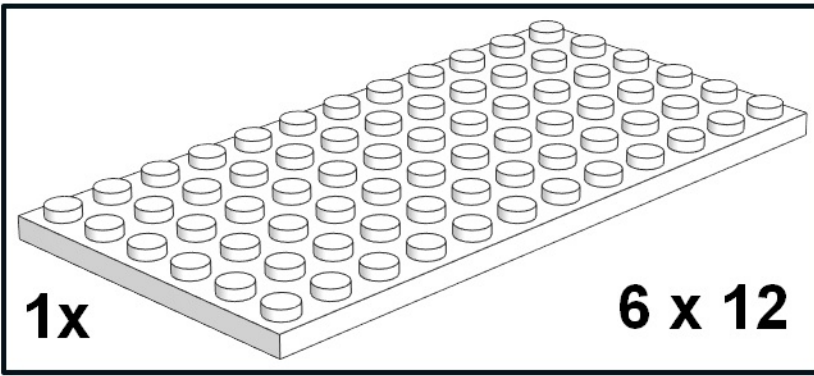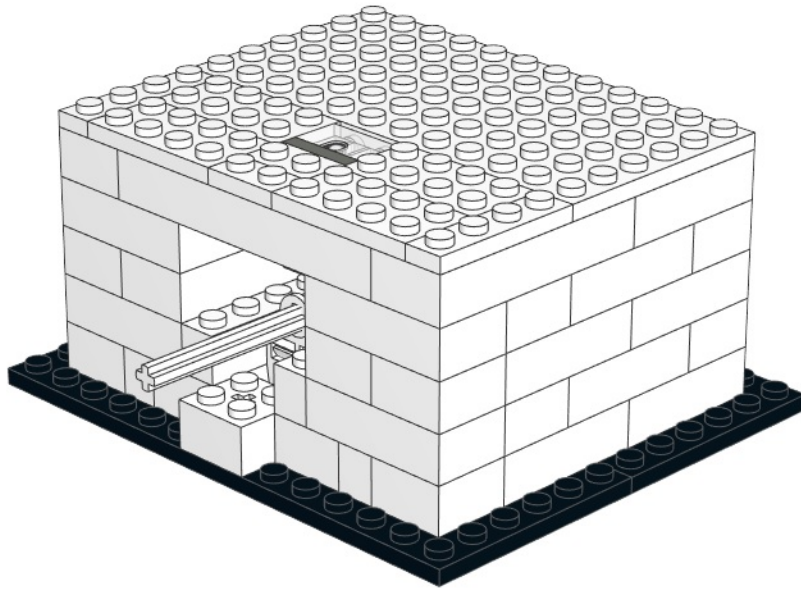

12

- 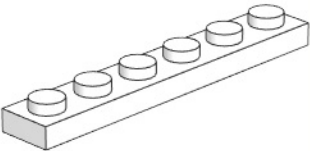  
**1x**
-   
**2x**
-   
**2x**
-   
**1x**
-   
**2x**

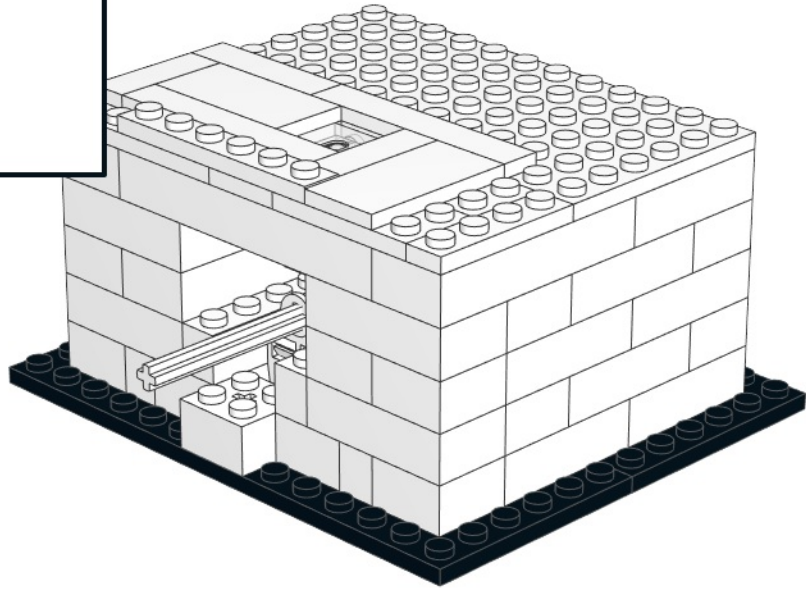

# 13

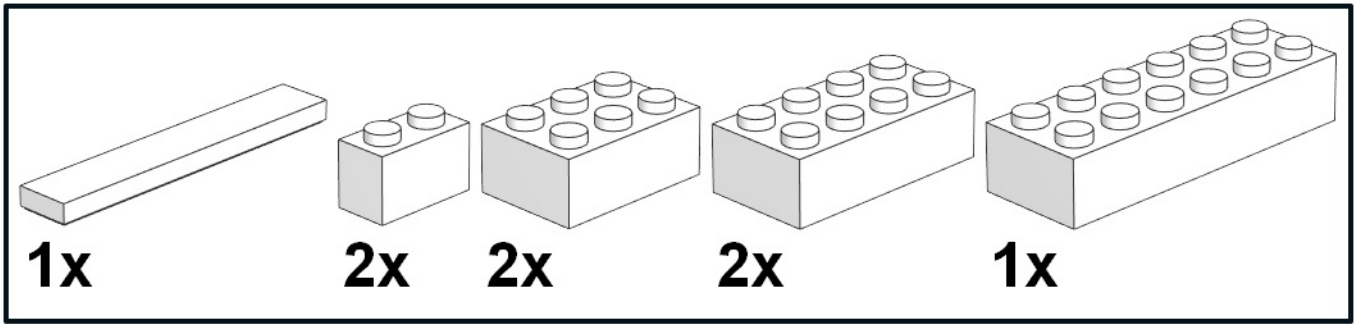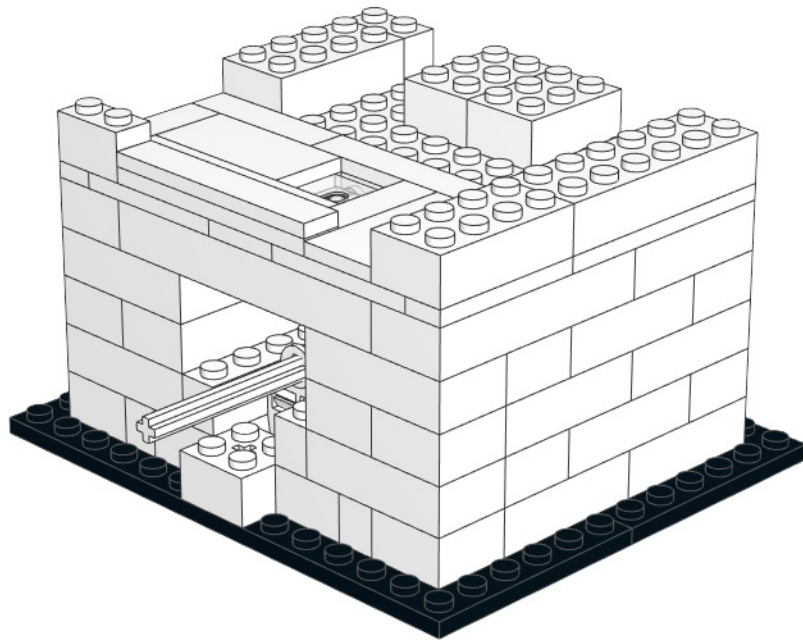

1

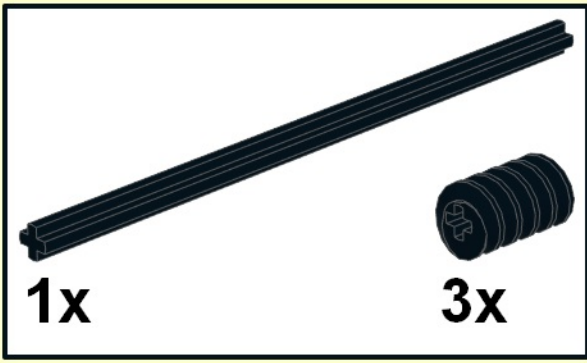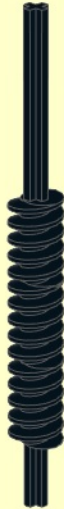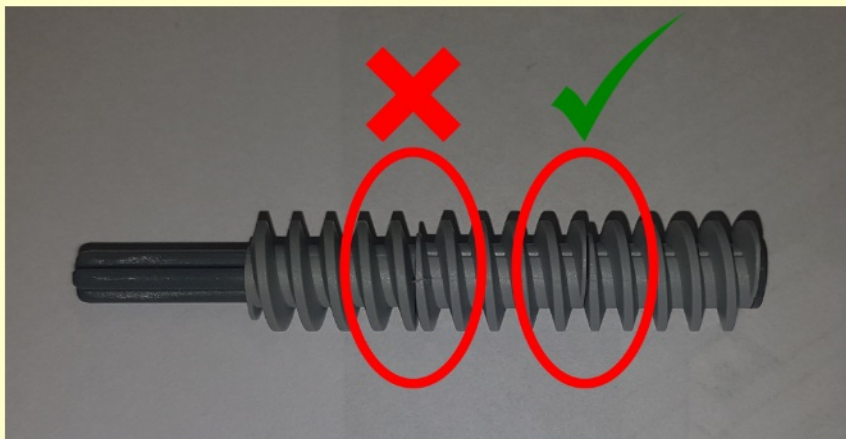

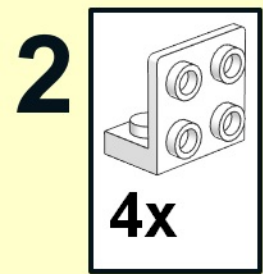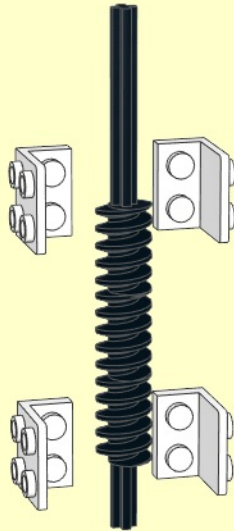



**3**

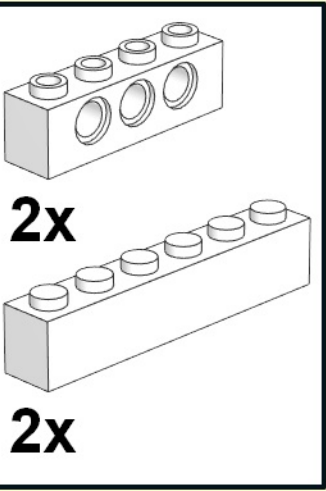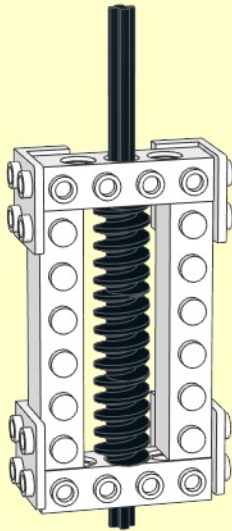

4

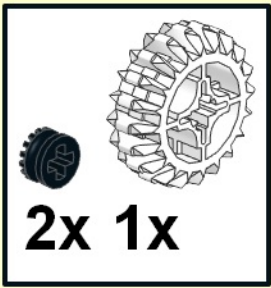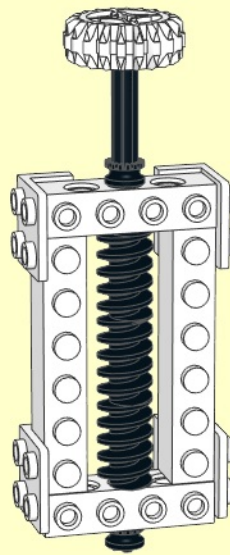

5

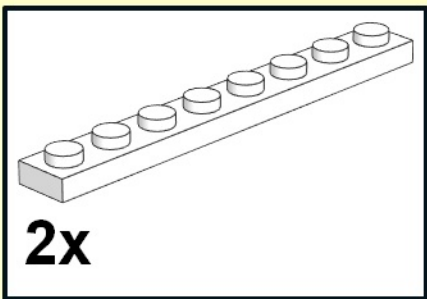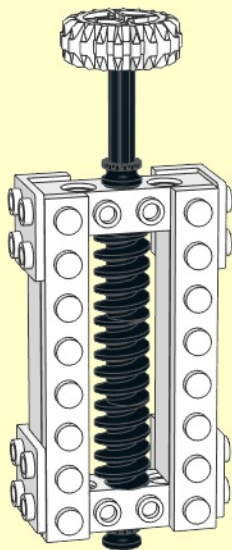

6

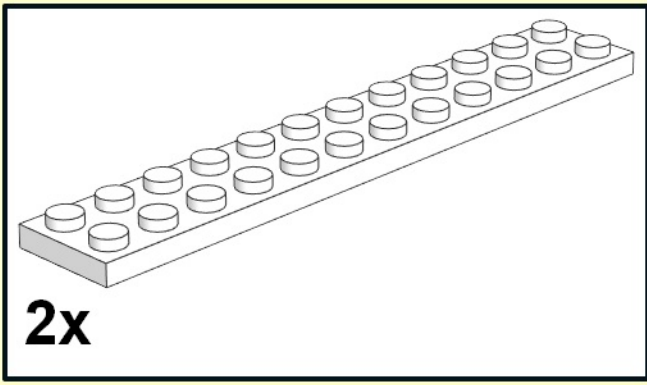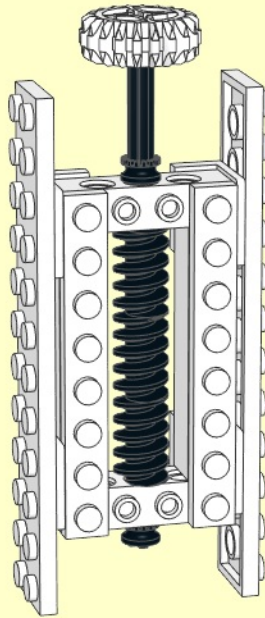

7

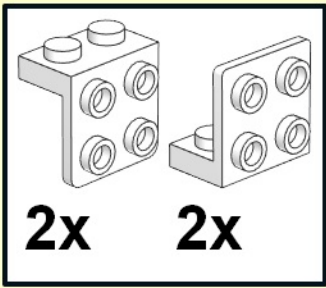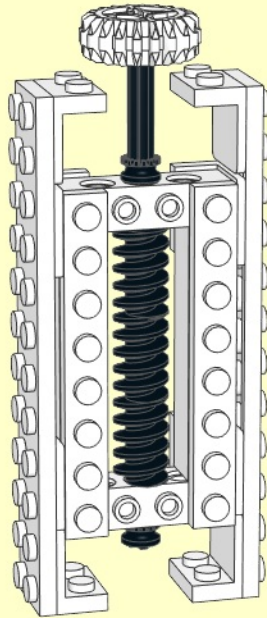

8

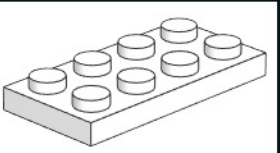

1x

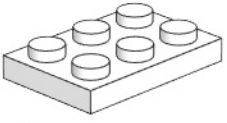

1x

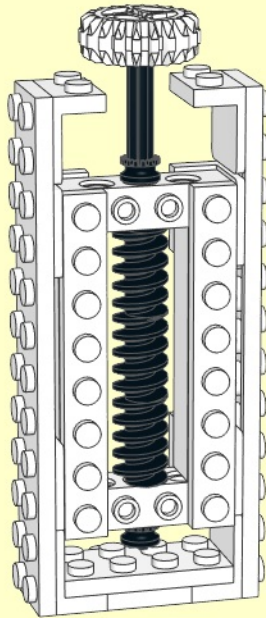

1

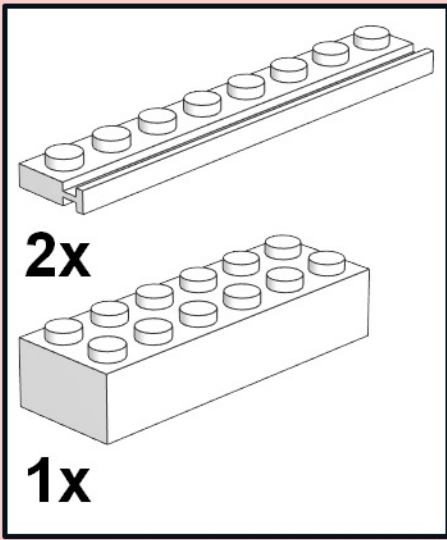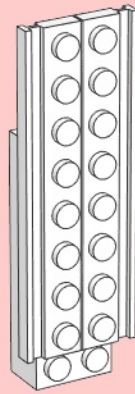

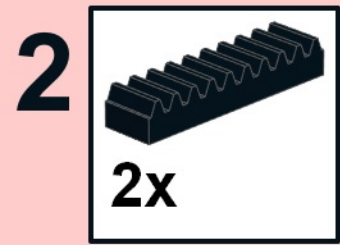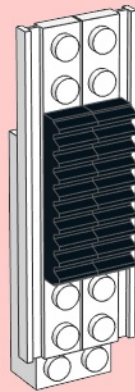



3

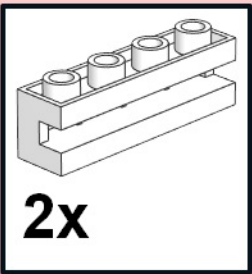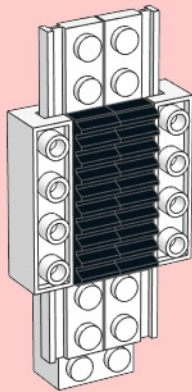

9

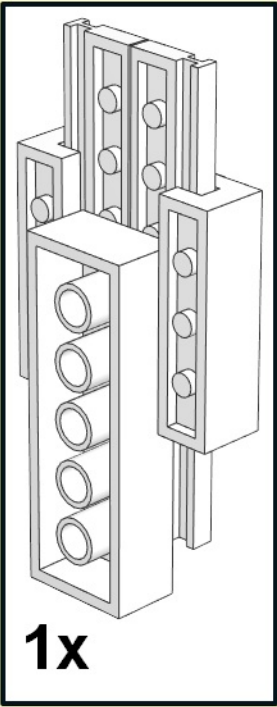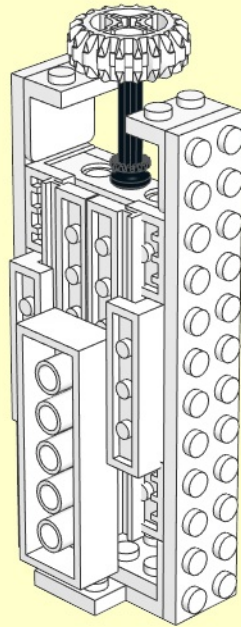

14

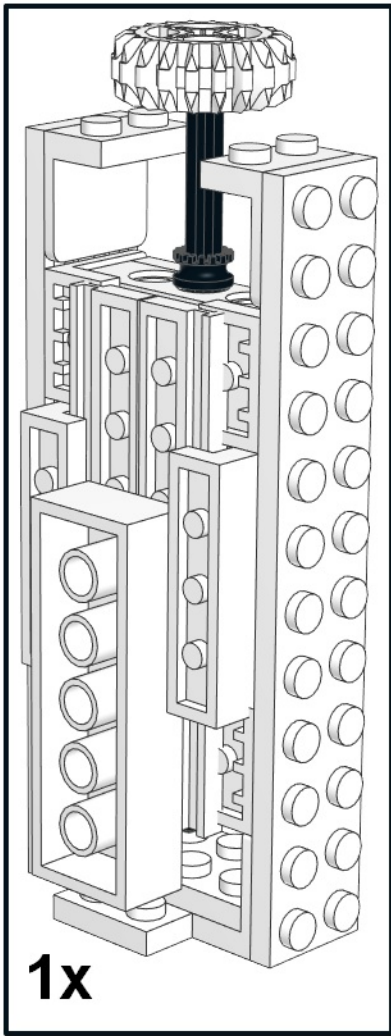

1x

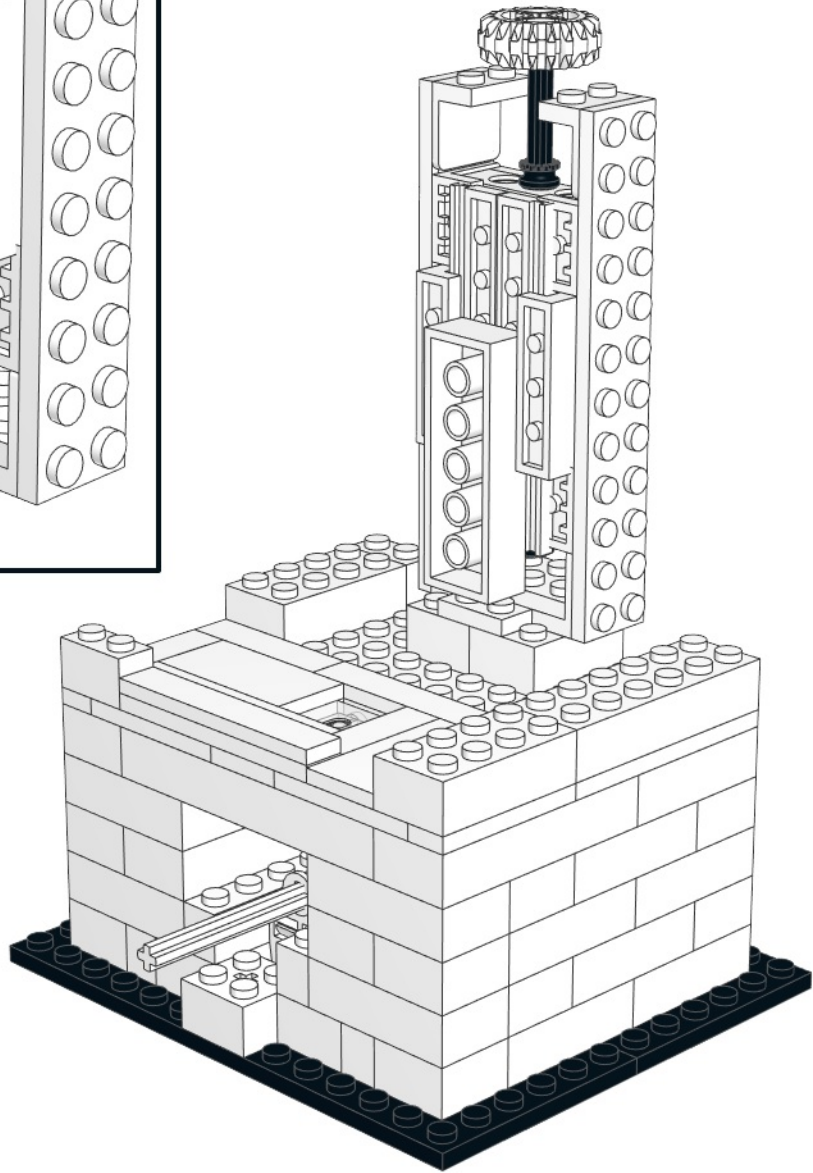

1

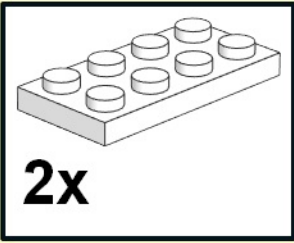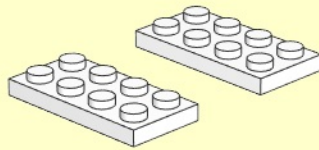

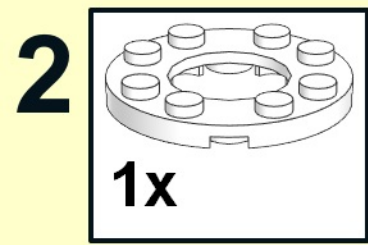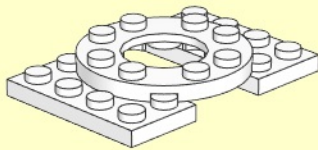

**3**

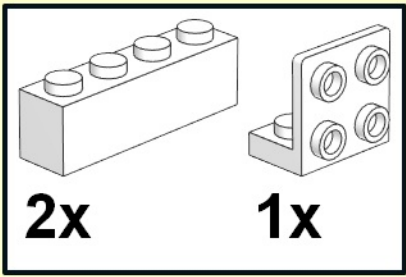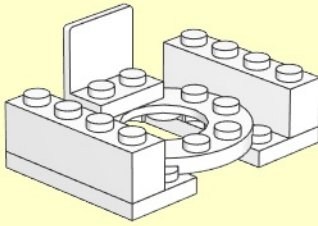

4  
1x

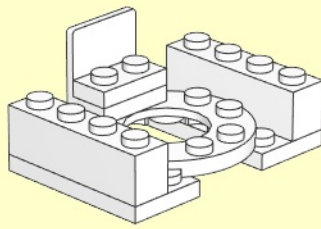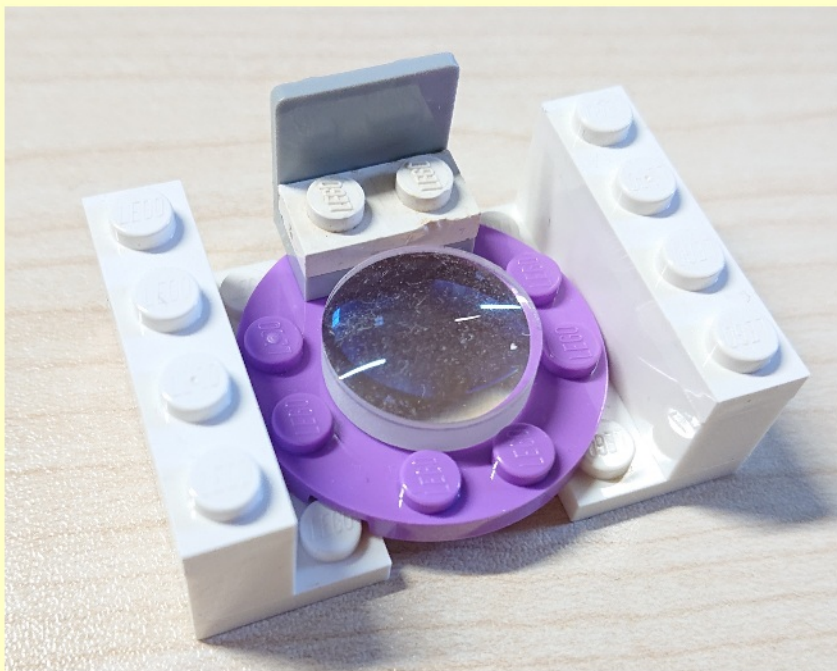

**5**

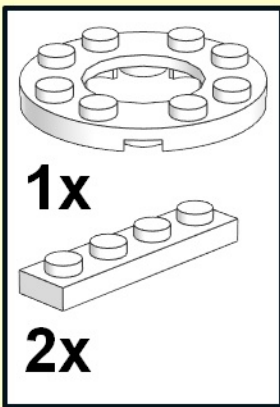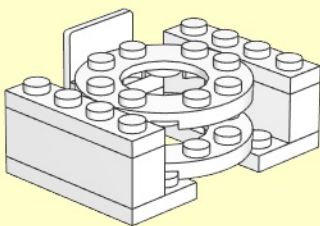



6

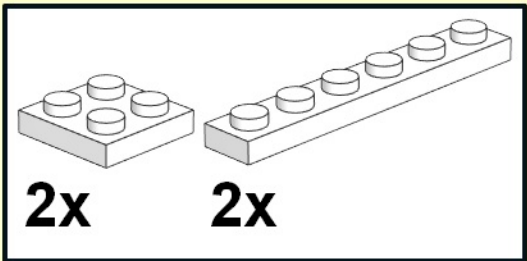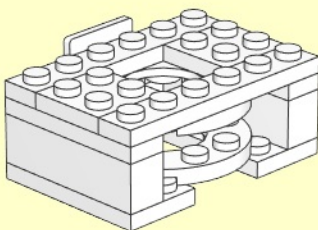

7

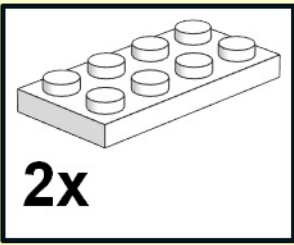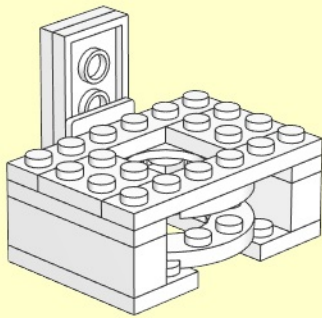

1

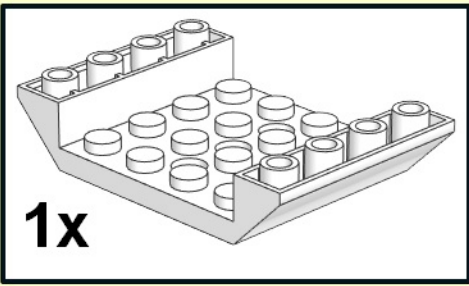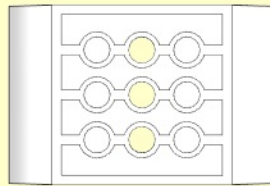

2  
2x

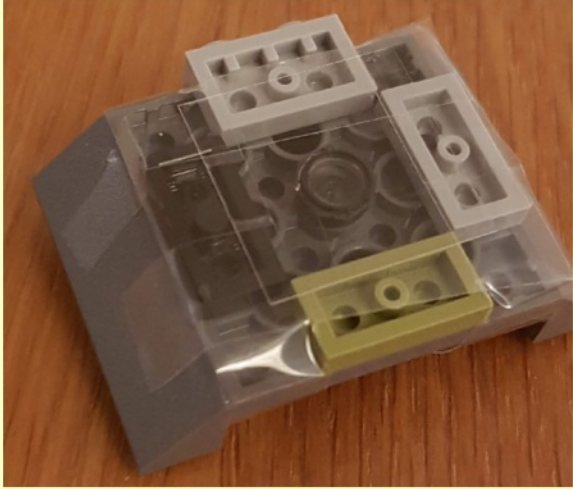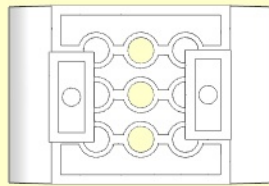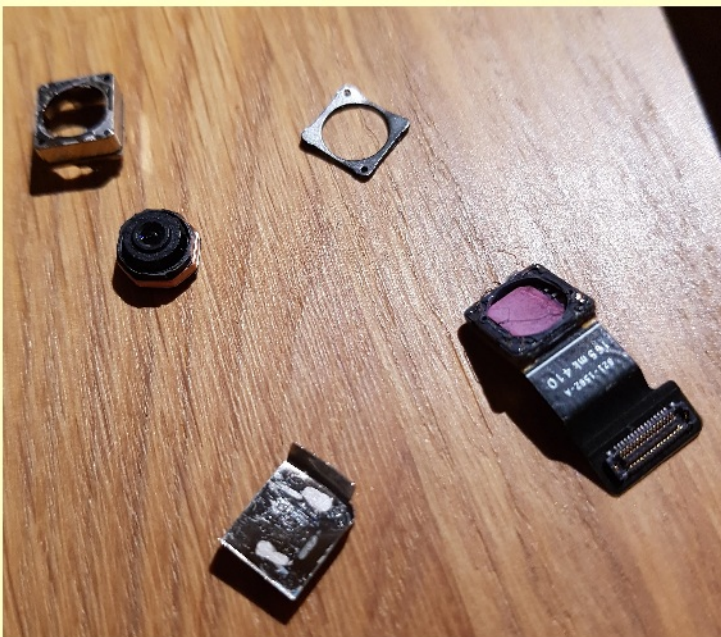

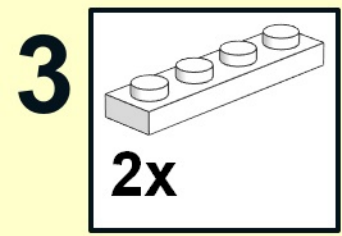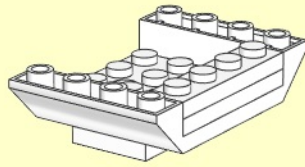

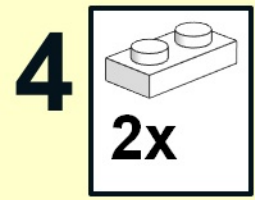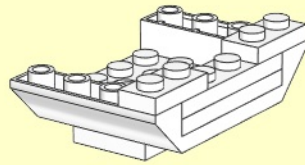

**5**

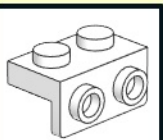

**1x**

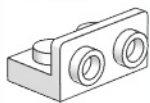

**1x**

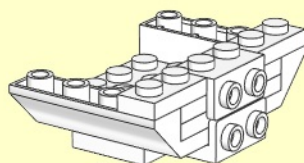

6

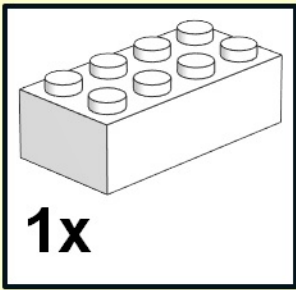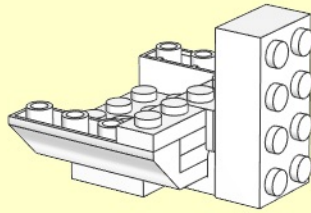



15

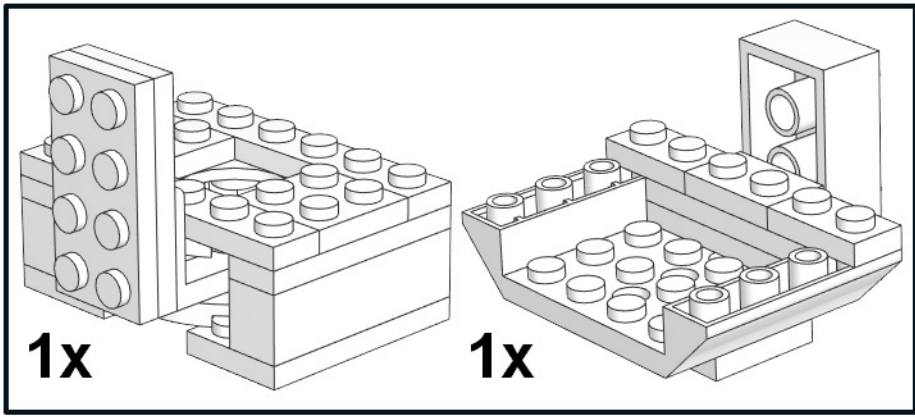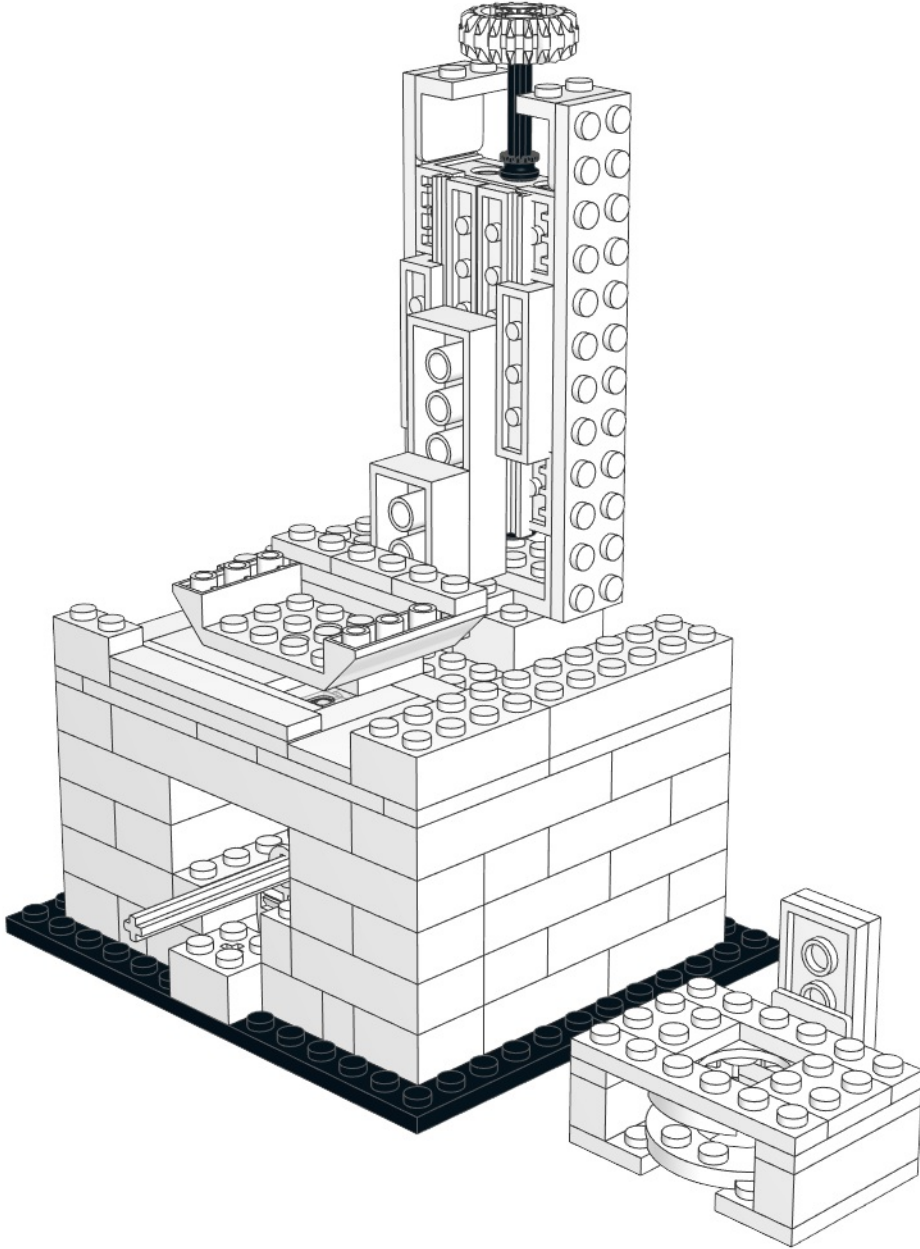

16

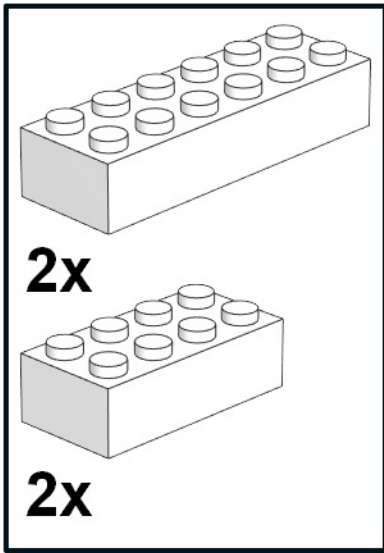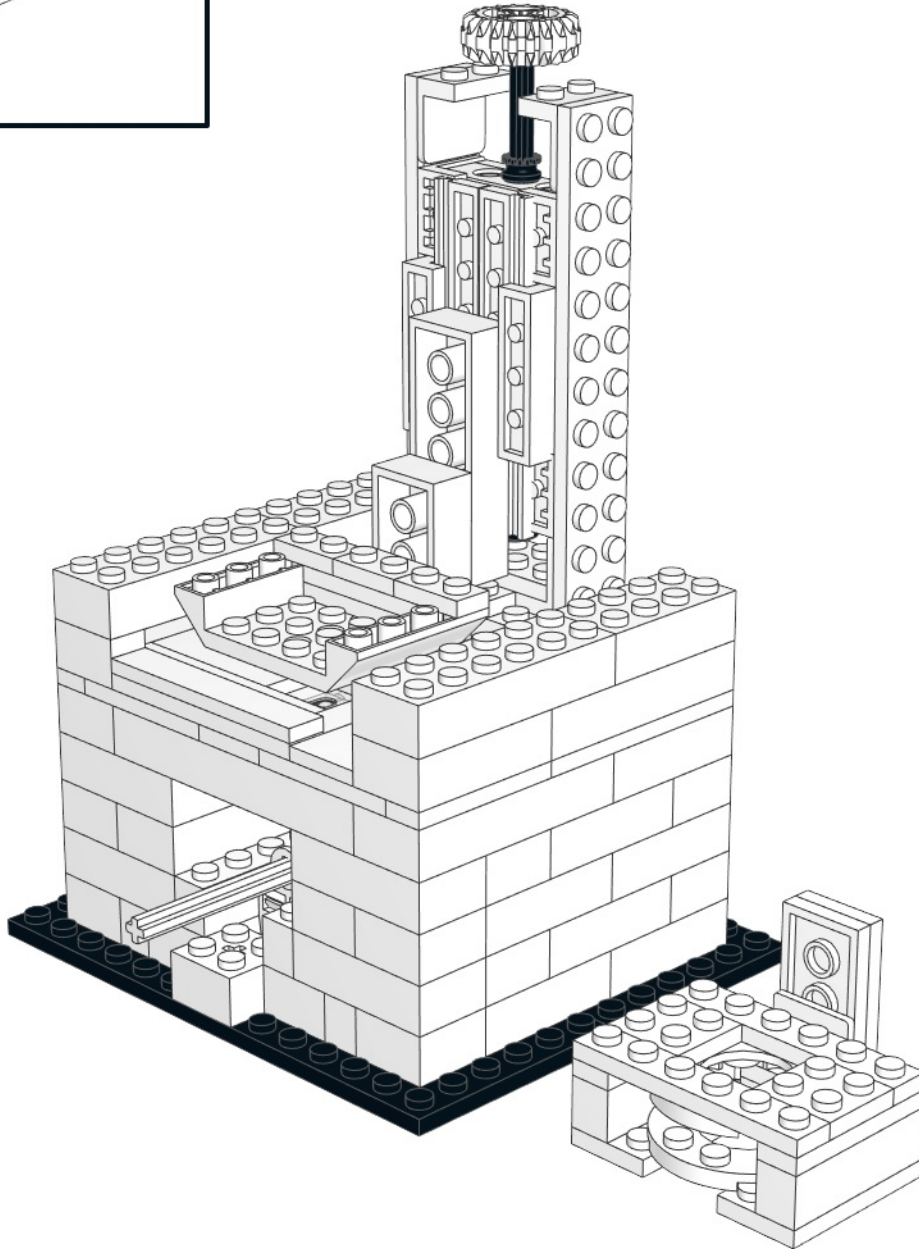

17

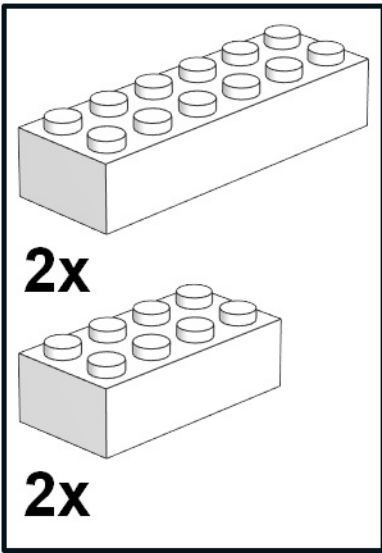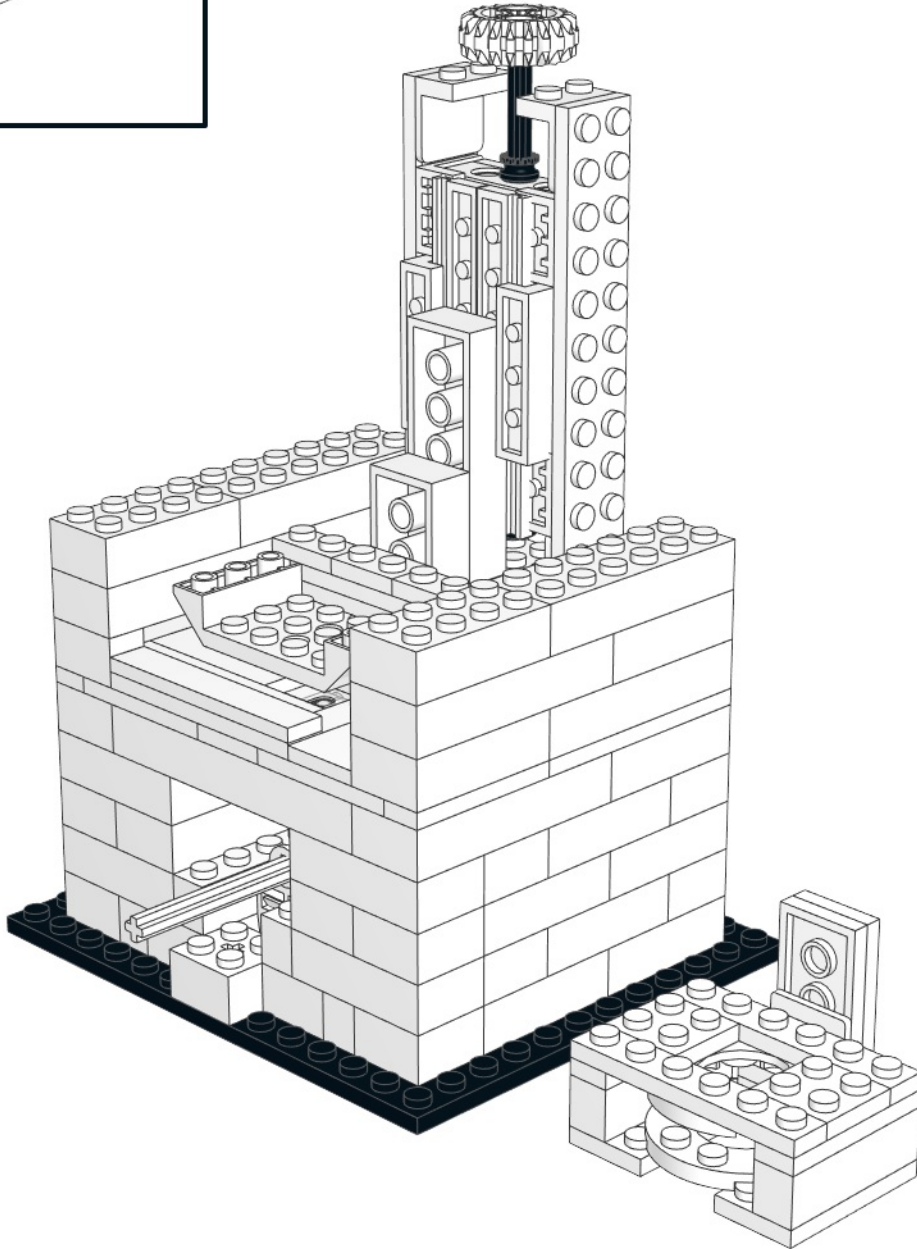

18

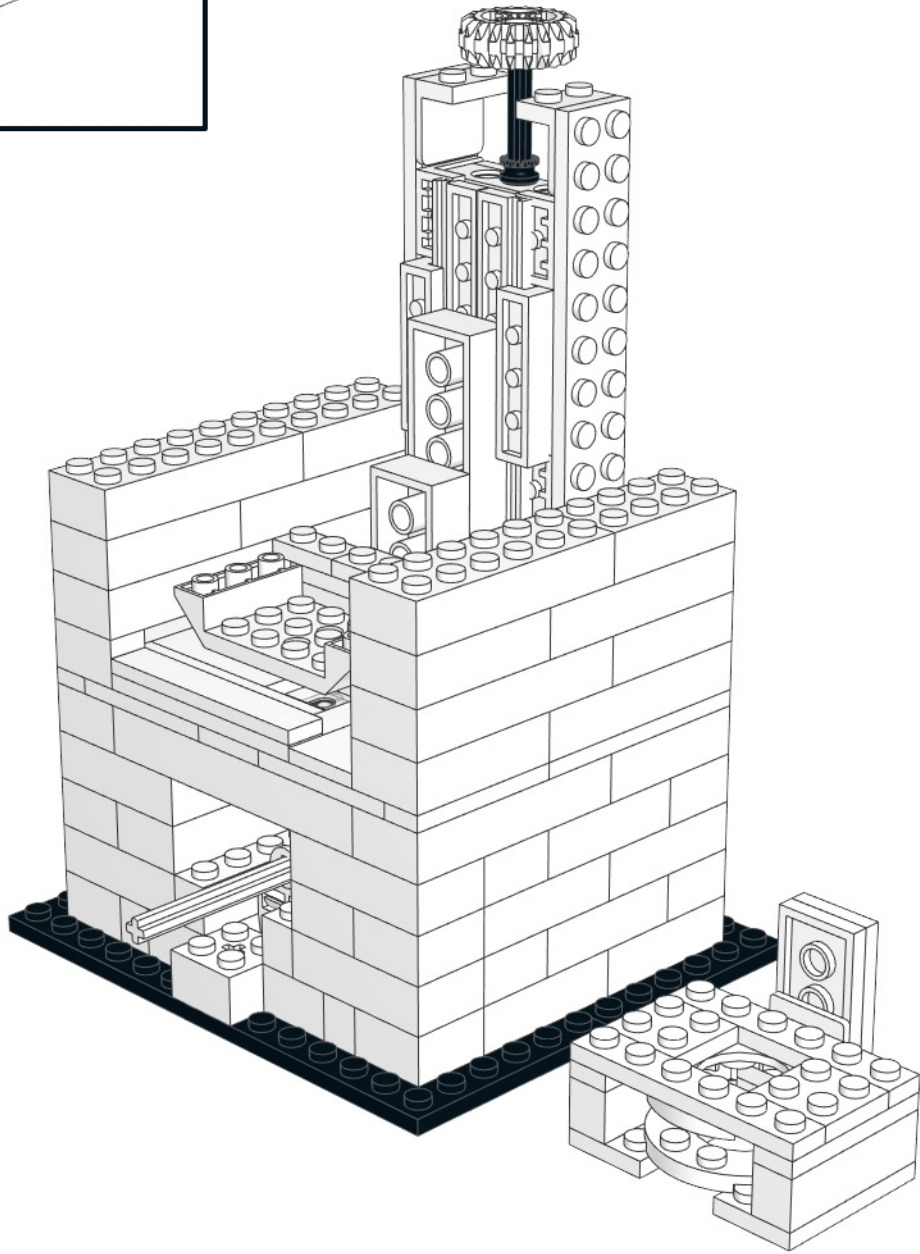

19

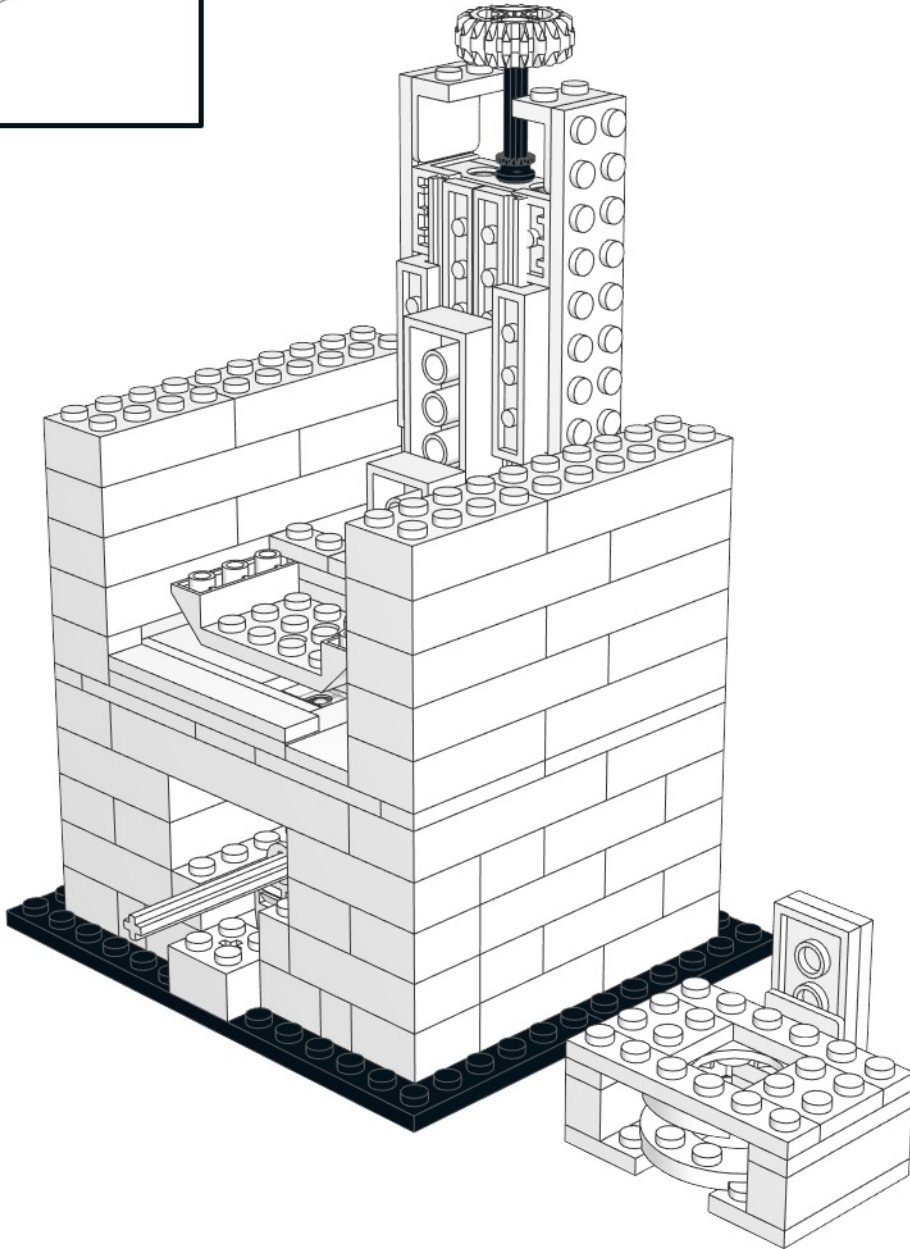

20

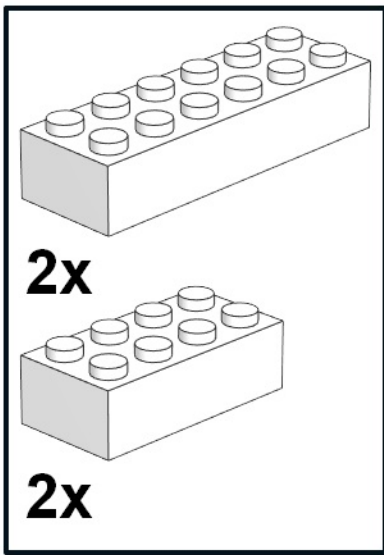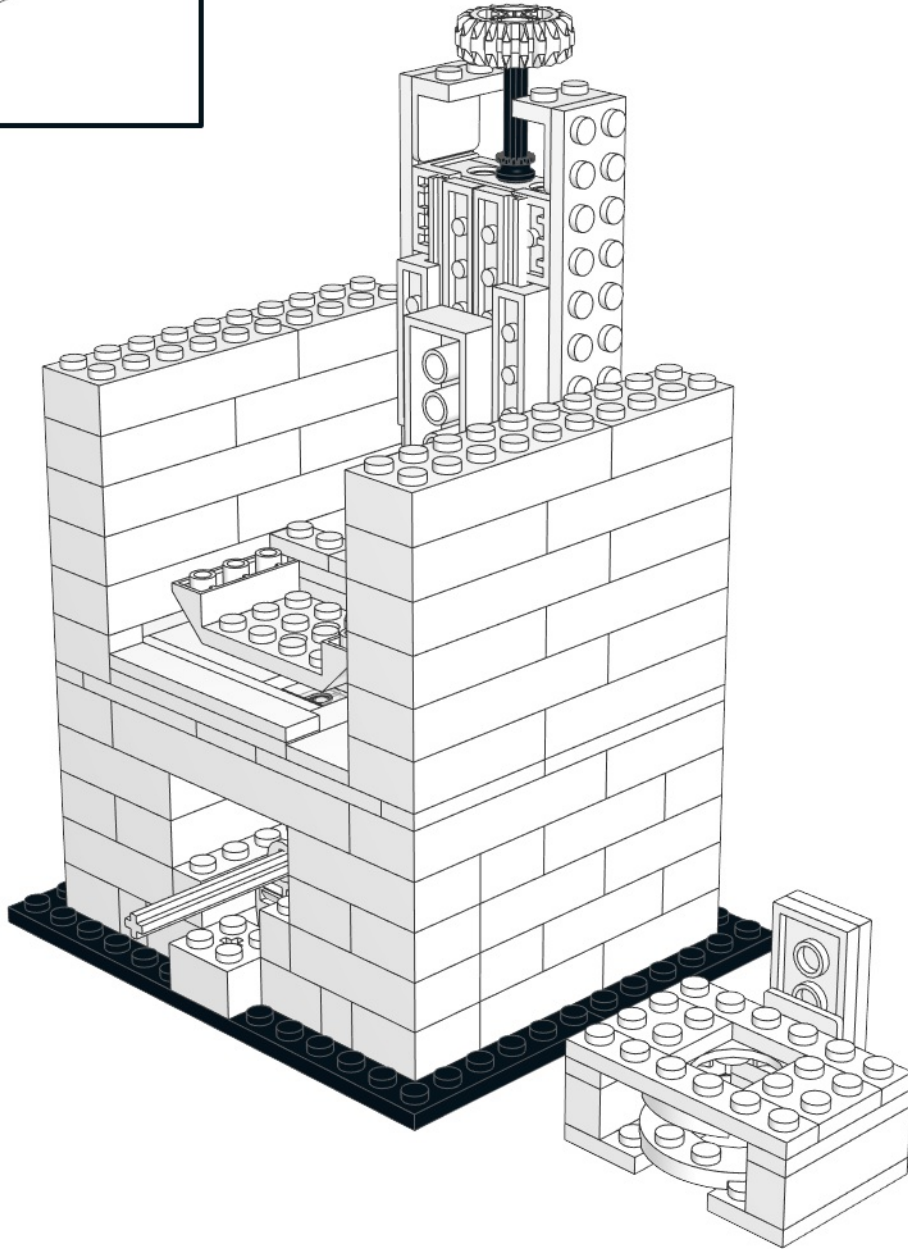

# 21

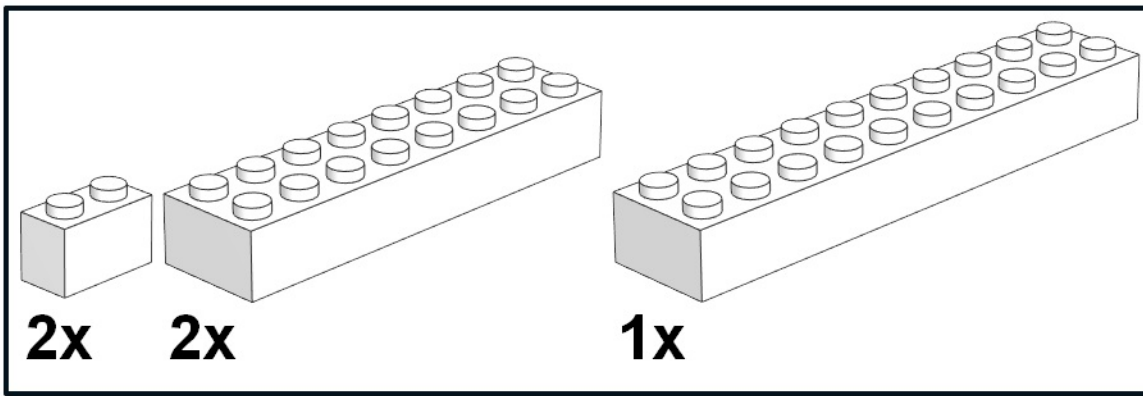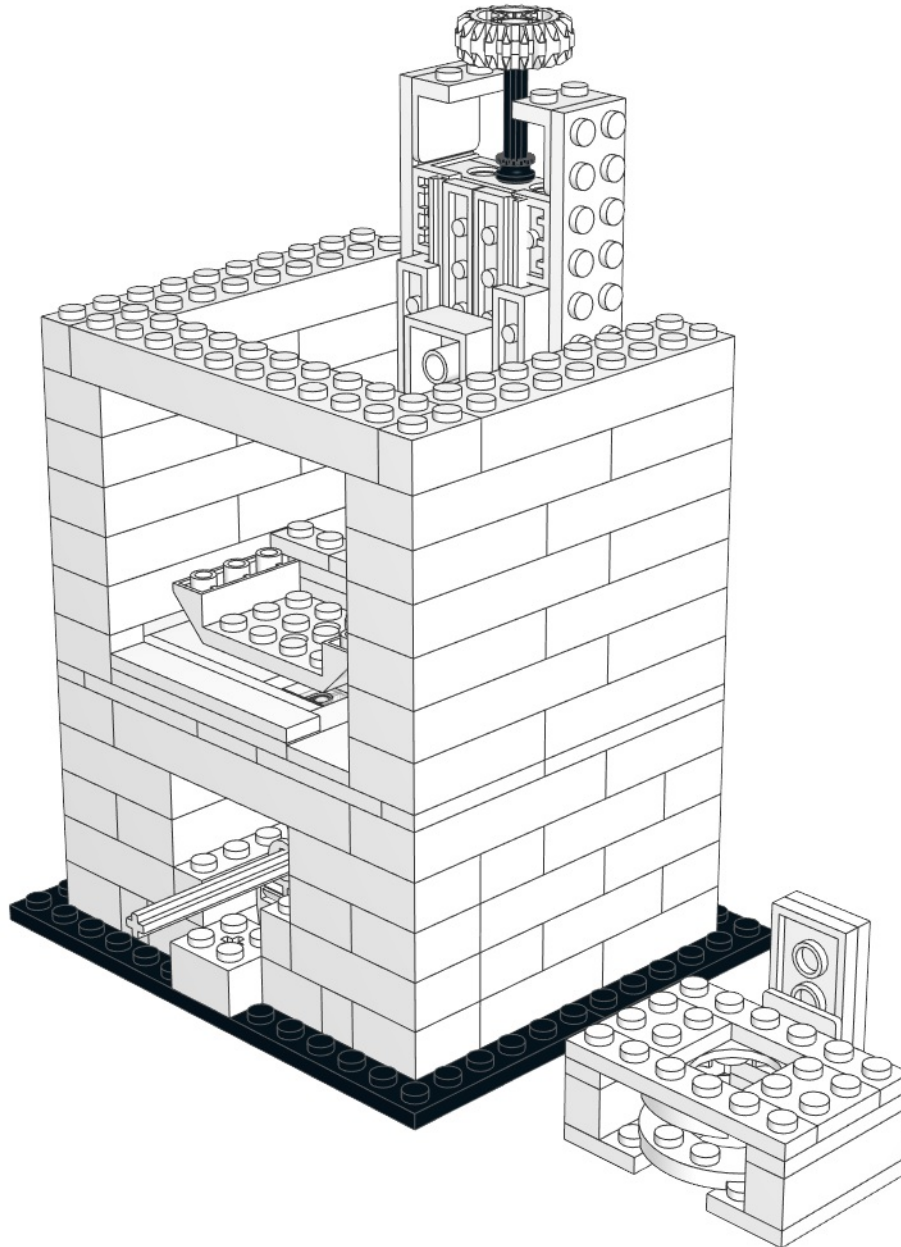

22

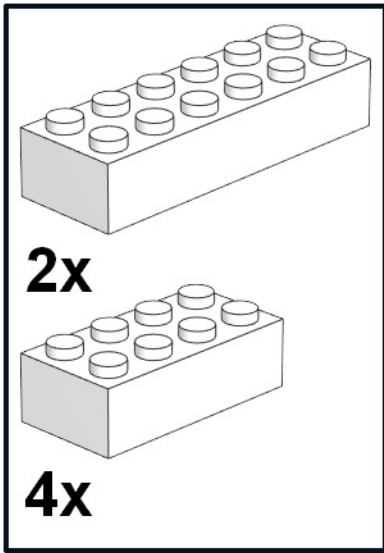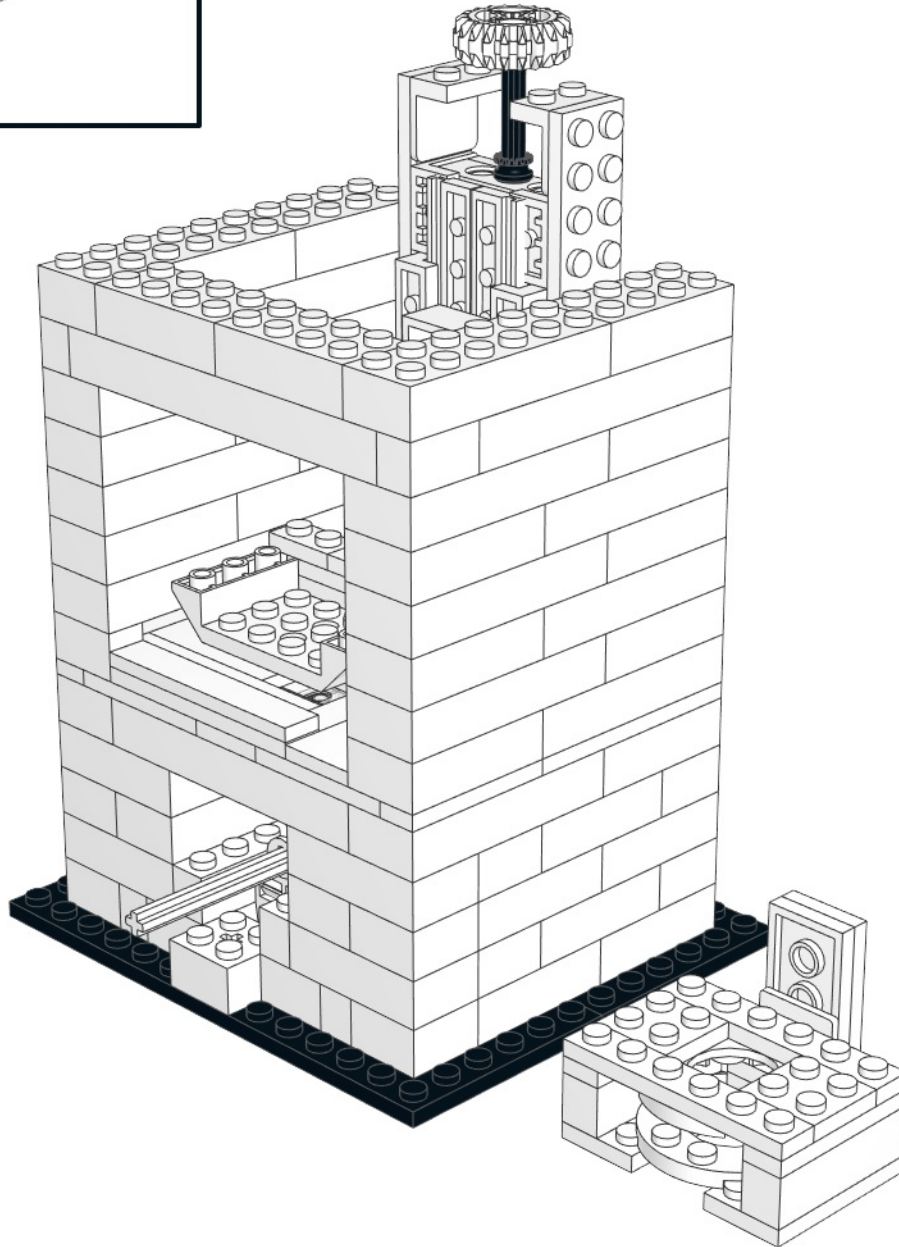



23

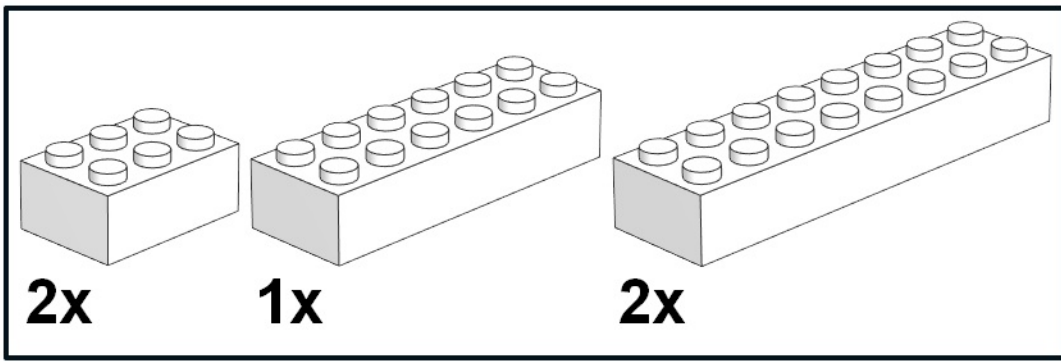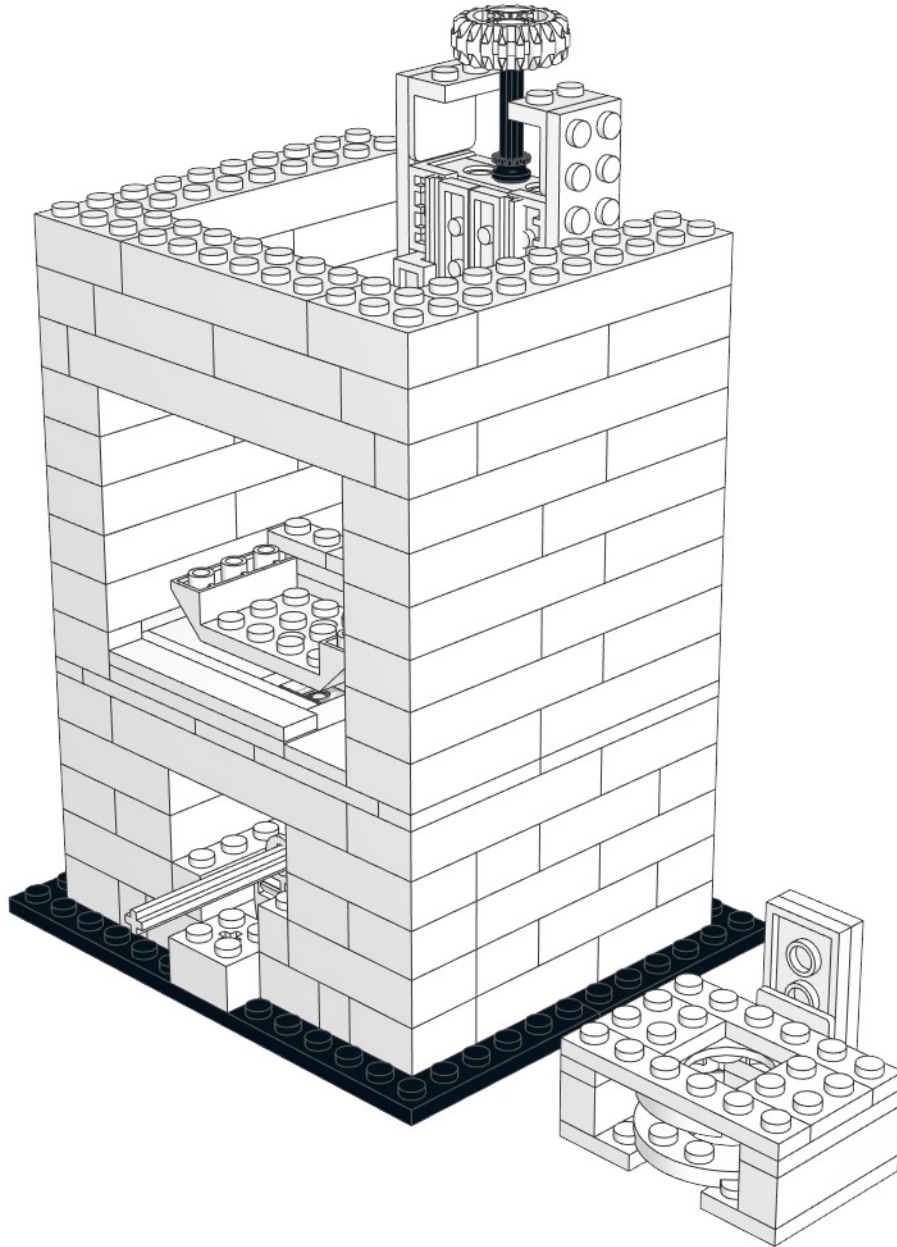

24

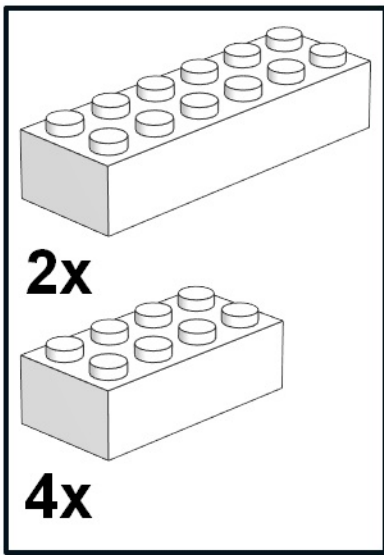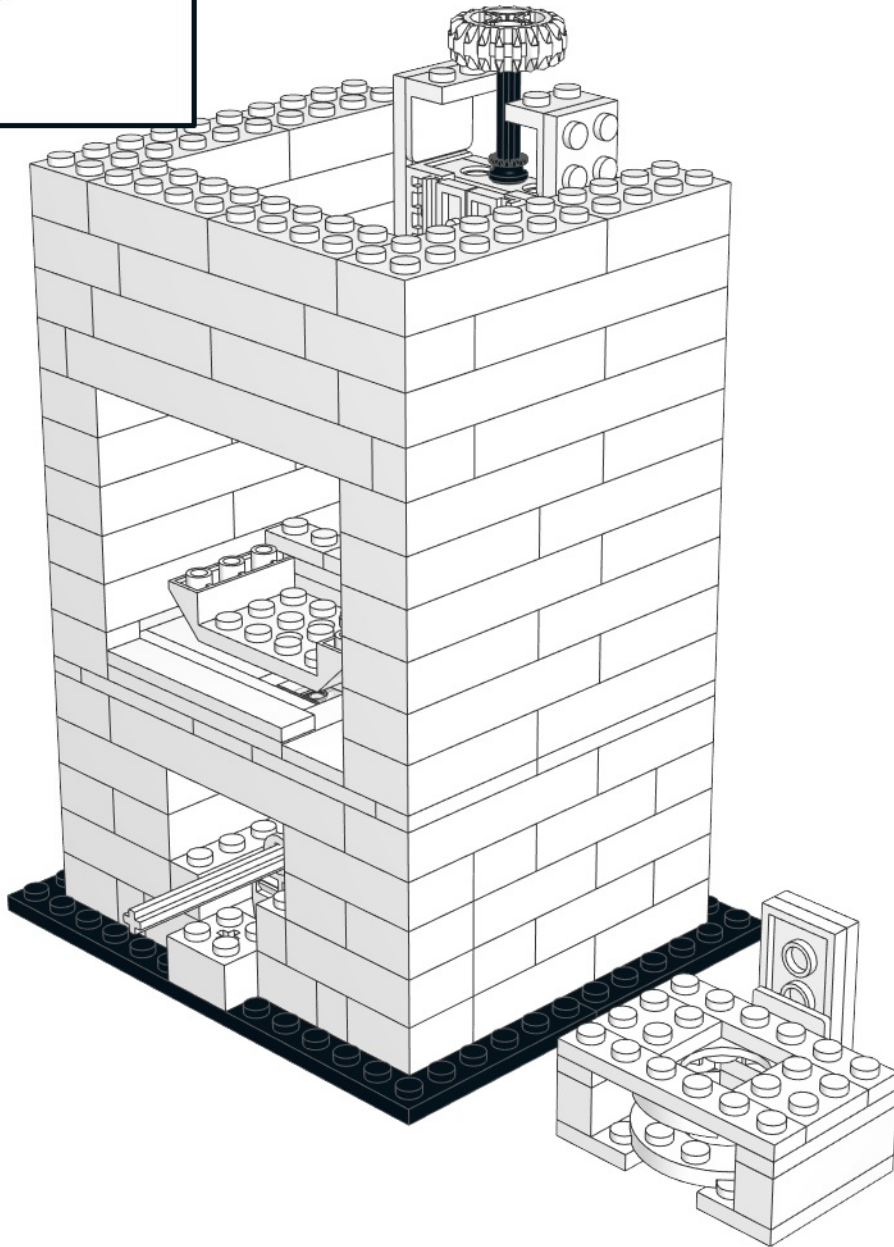

25

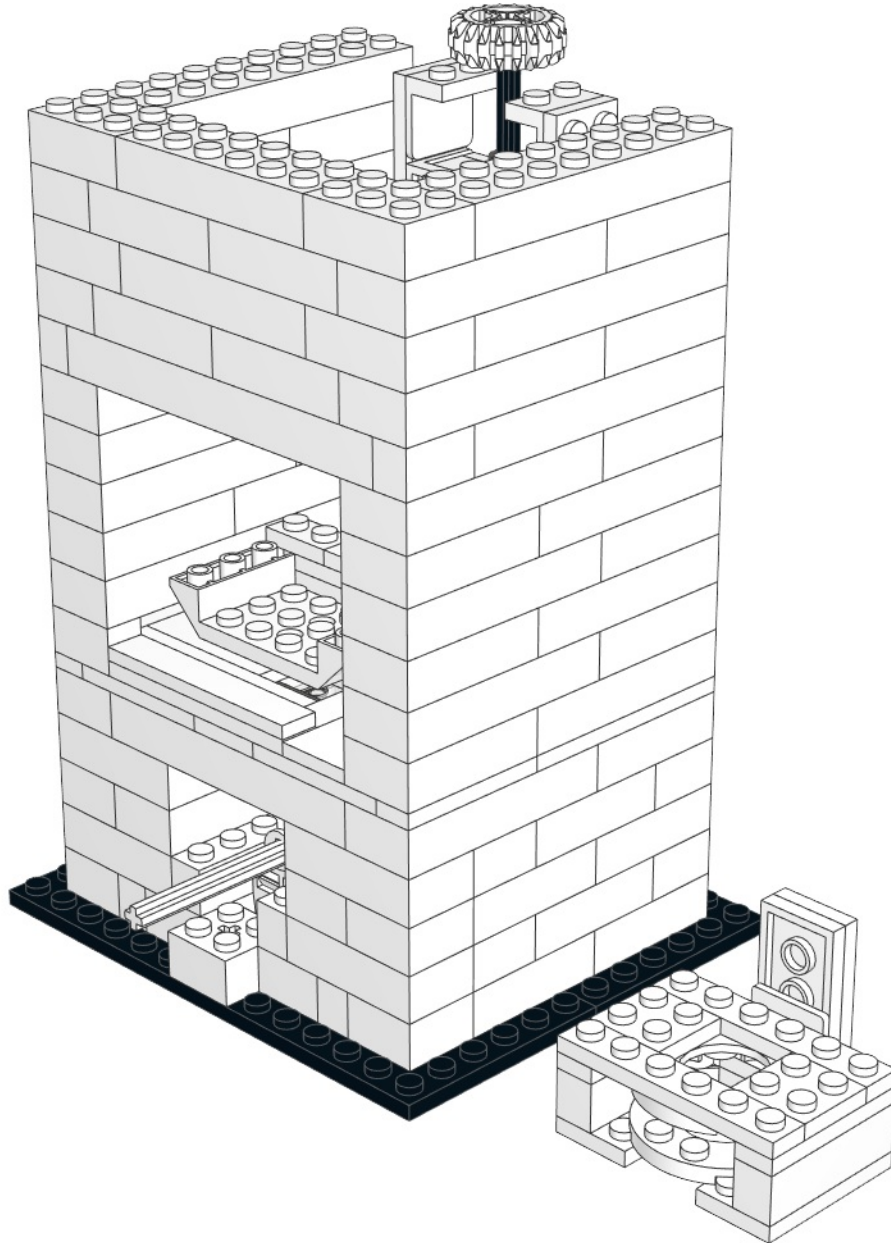

26

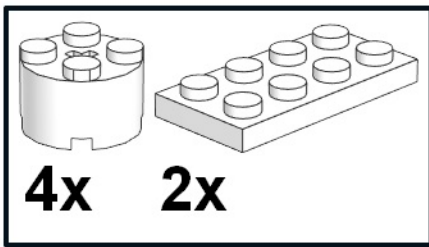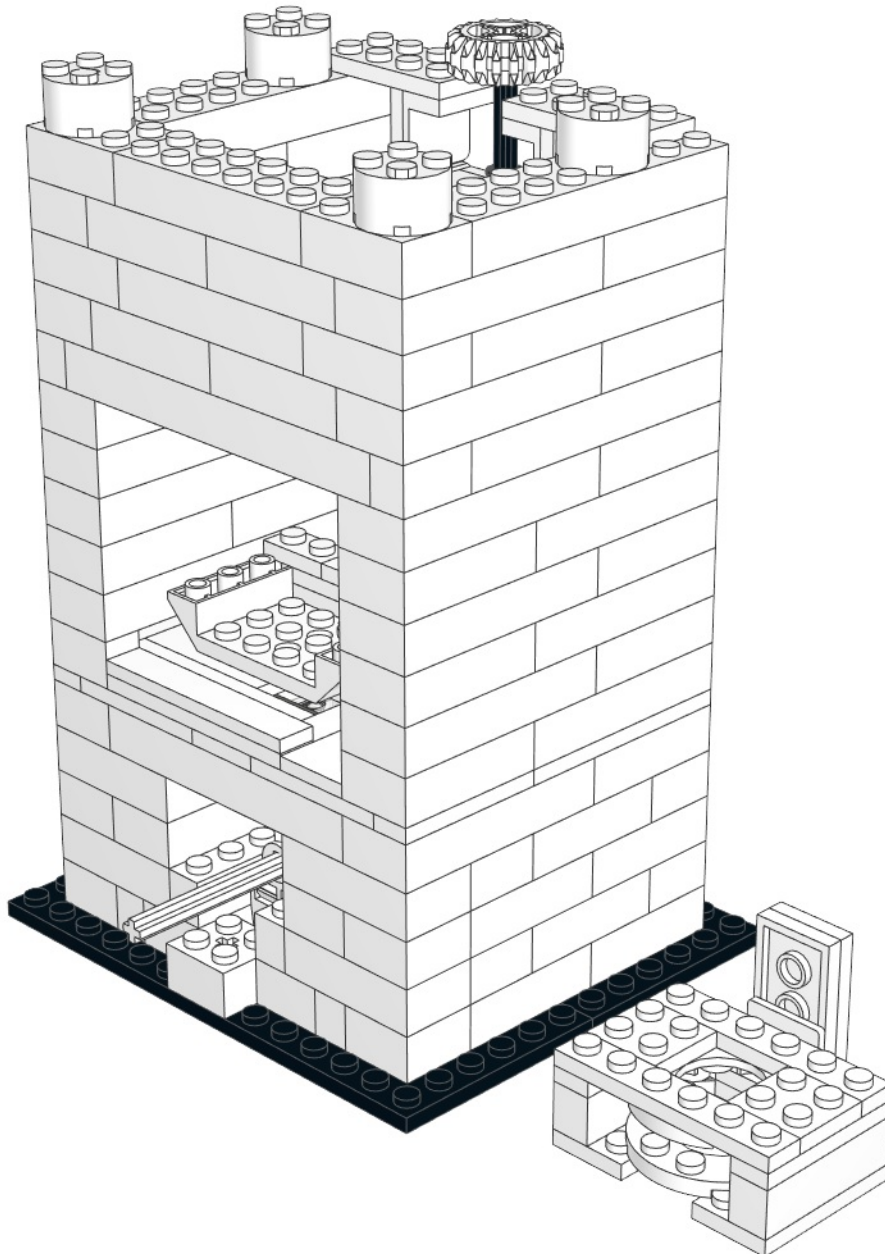

27

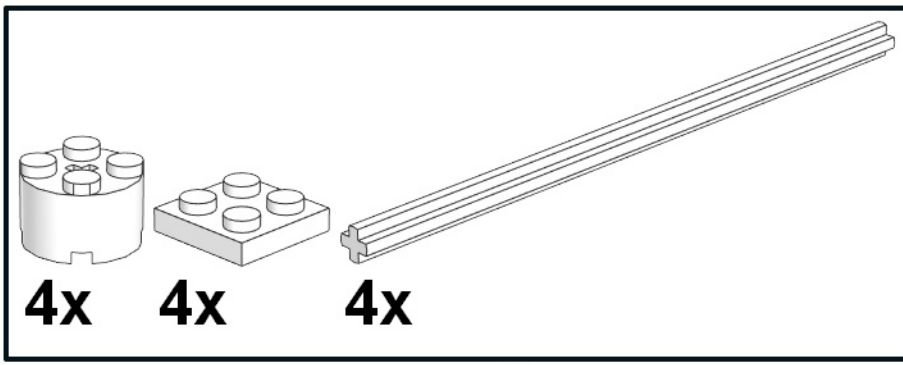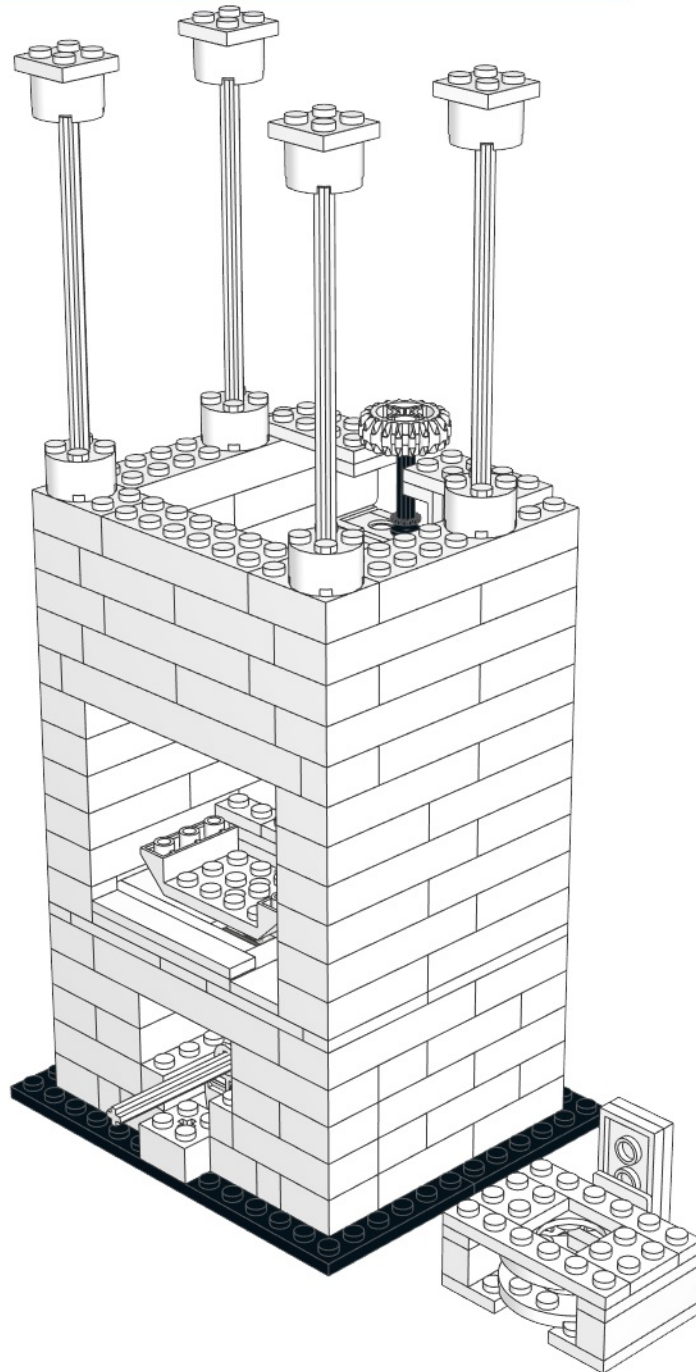

1

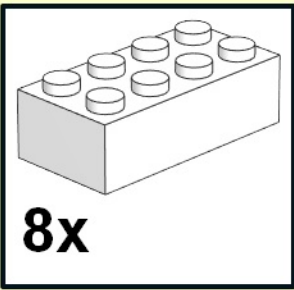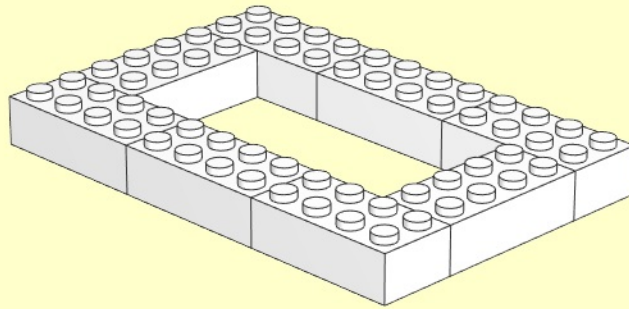

2

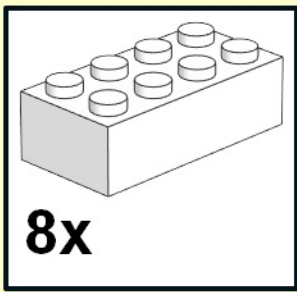

8x

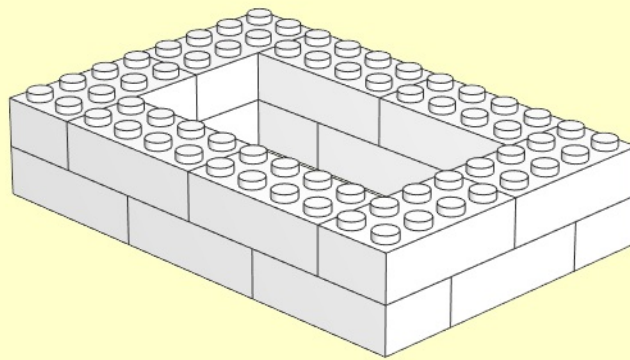

**3**

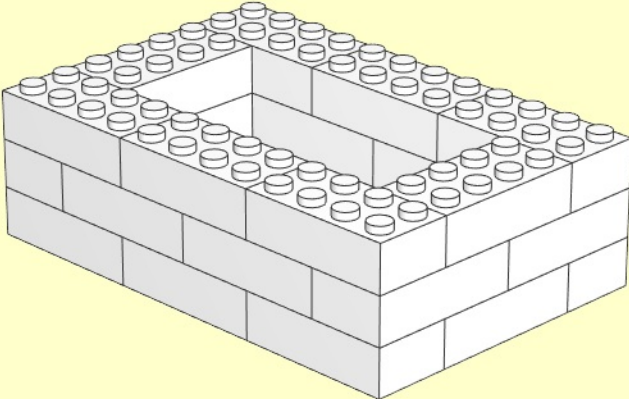



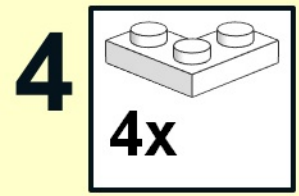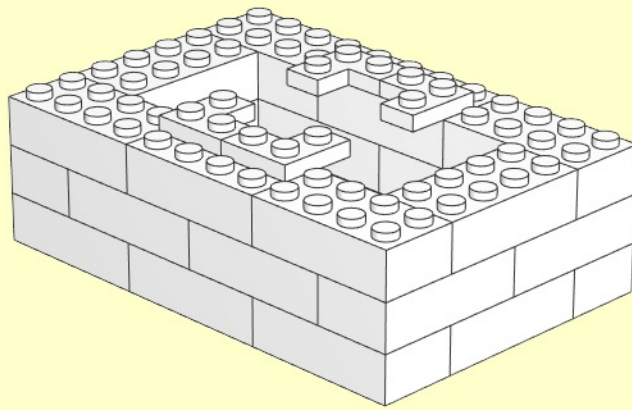

5

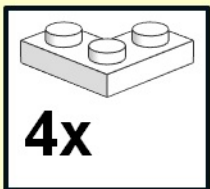

4x

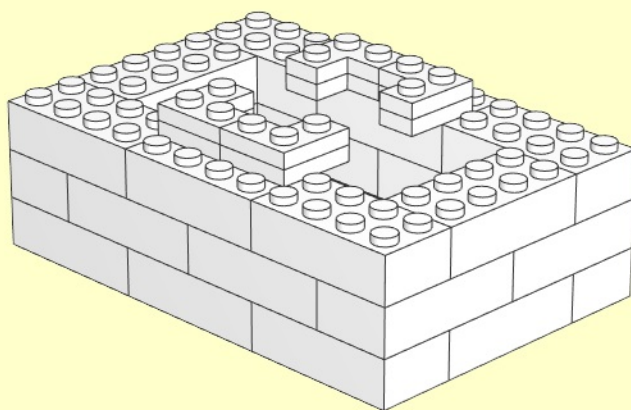

6

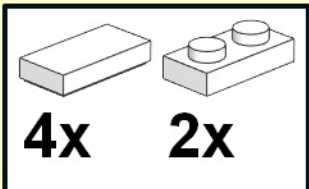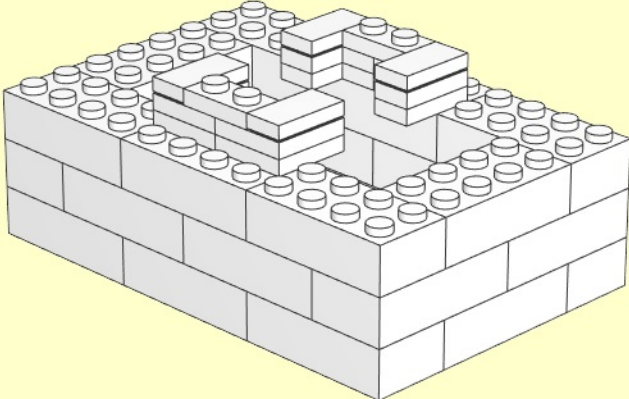

7

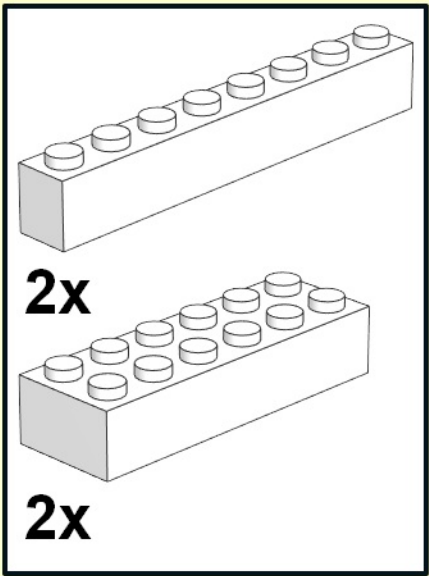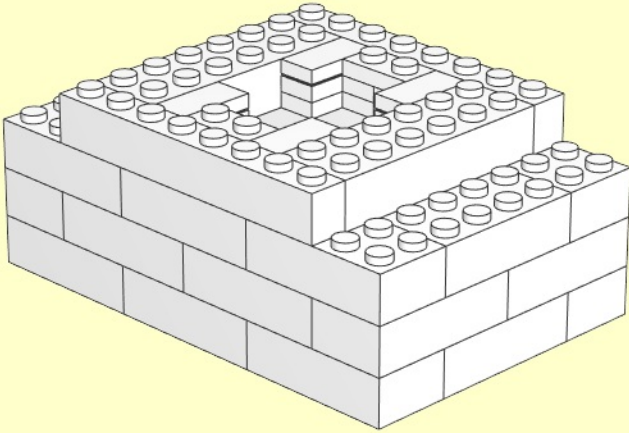

8

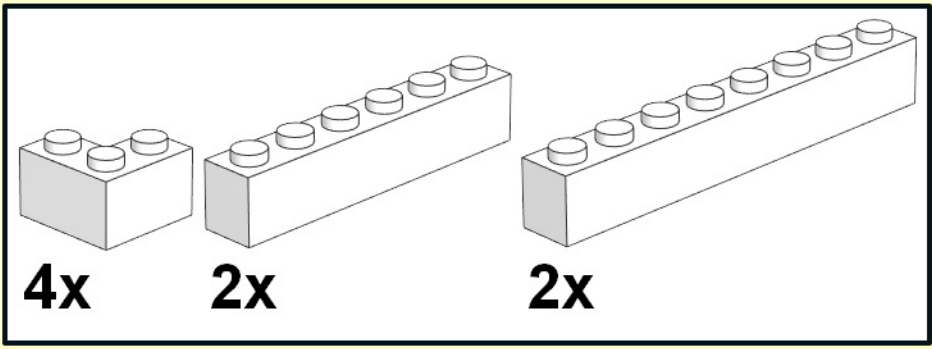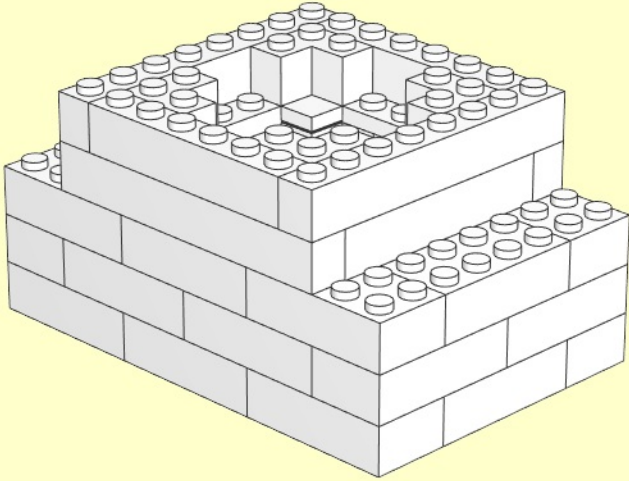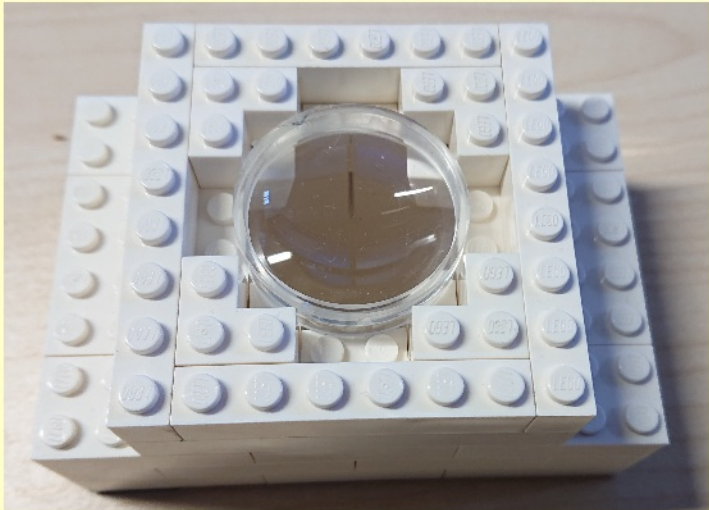

9

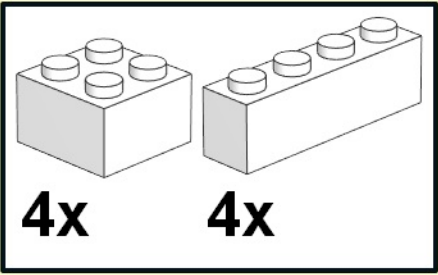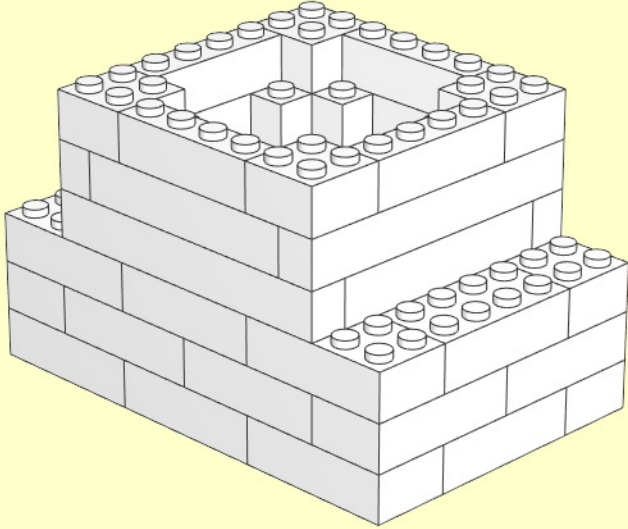

10

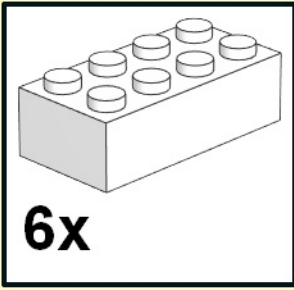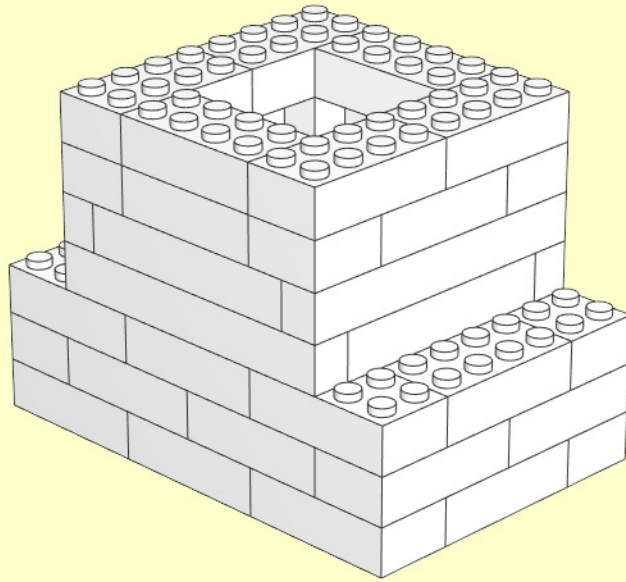

11

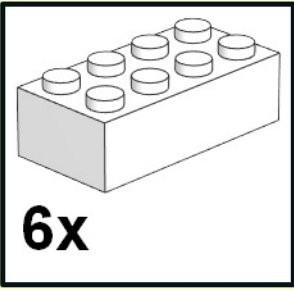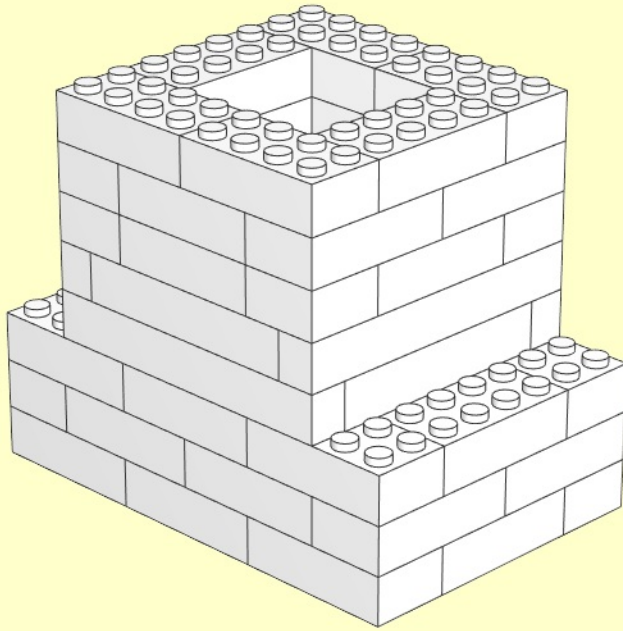



12

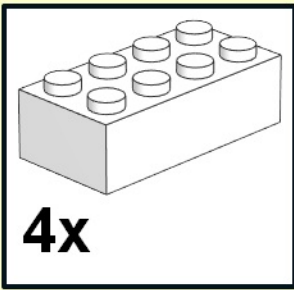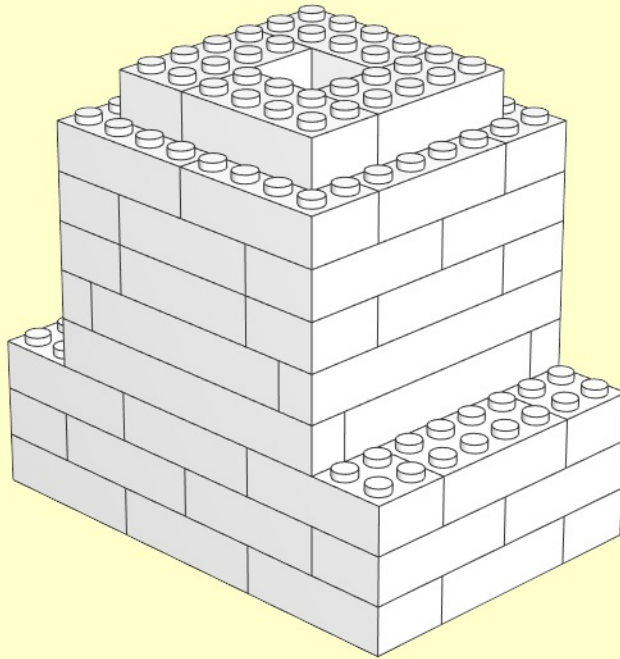

13

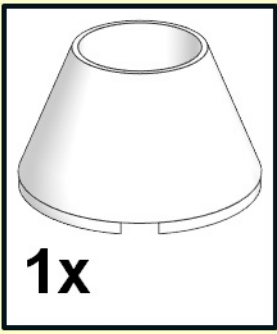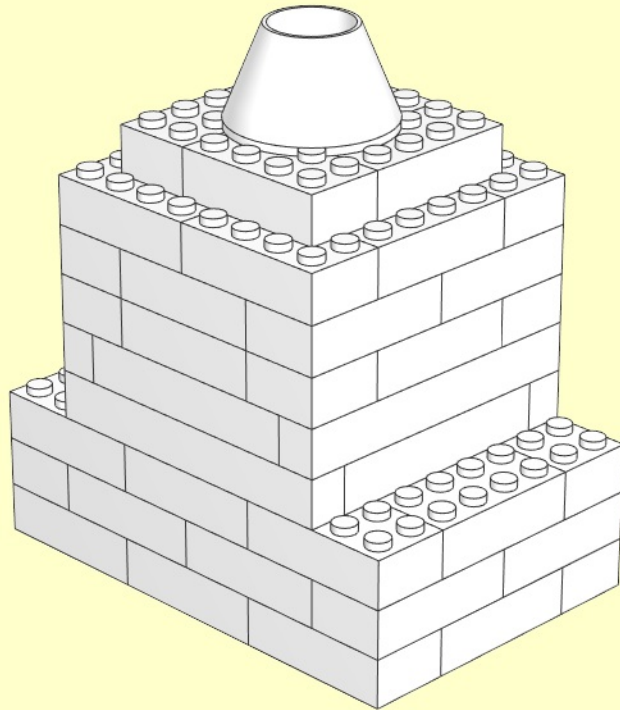

14

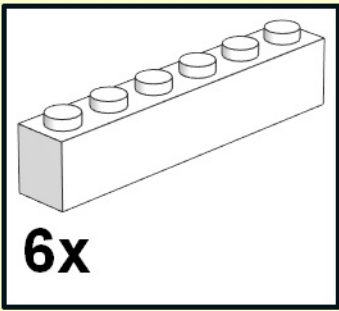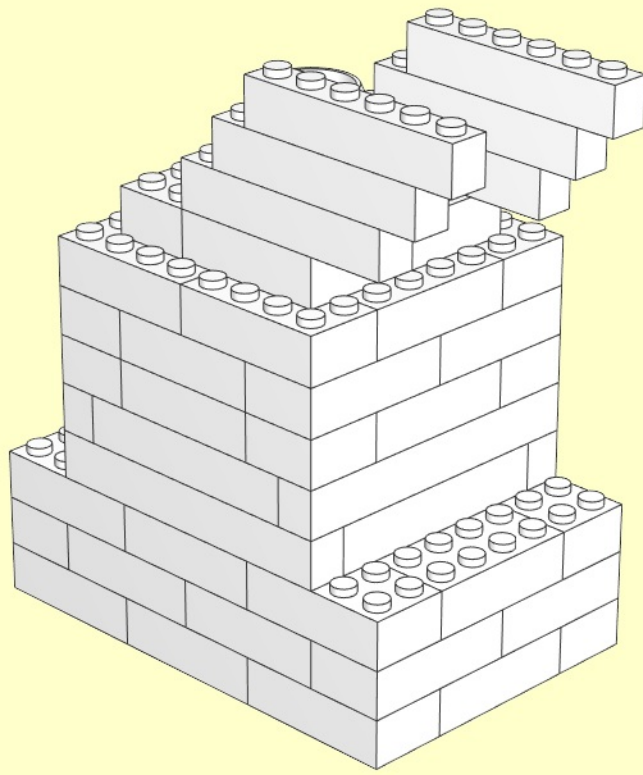

15

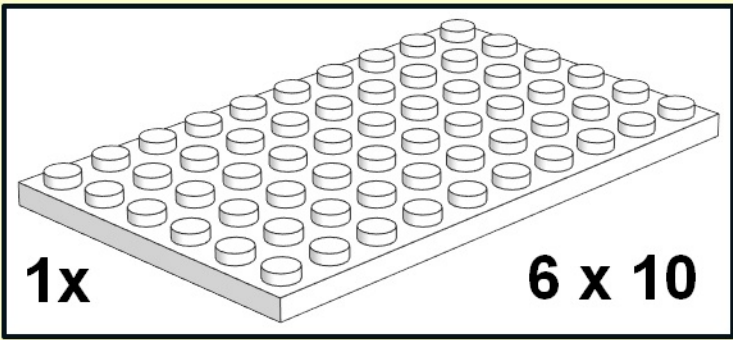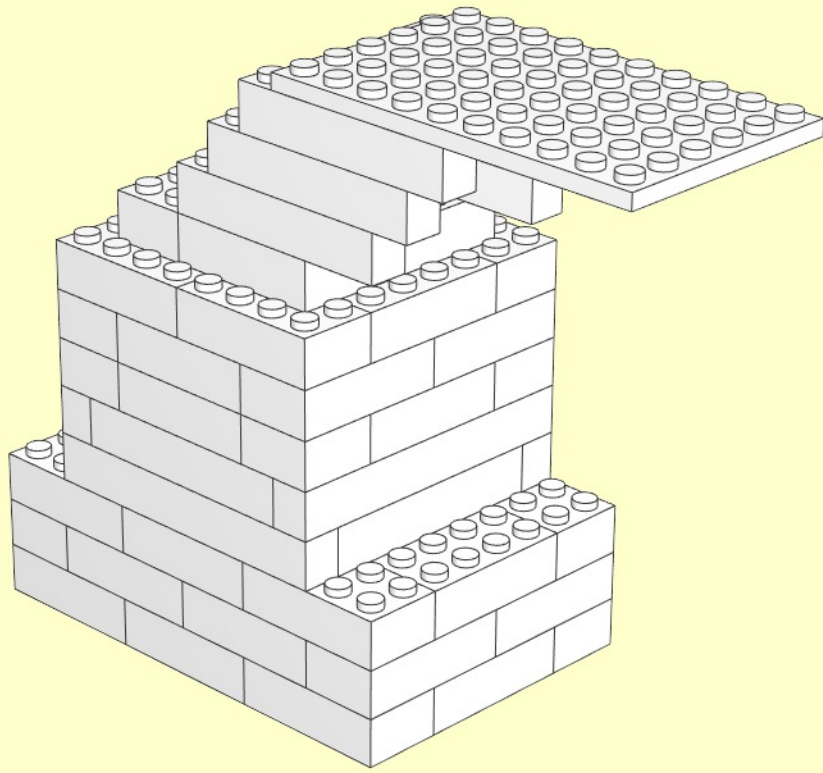

Supplement: Supplementary file [file media-9.pdf]
