# Supplementary material for: Designing a high-resolution, LEGO-based microscope for an educational setting
Source: bioRxiv or medRxiv preprint supplement (doi:10.1101/2021.04.11.439311), 2021-04-11

# Questionnaire A

Name:

## 1: To start a fire, you need ...

- Oxygen (air)
- Heat
- Fuel (e.g. wood)
- All three

## 2: Where is the flame of a candle at its hottest?

- In the yellow region
- Directly above the wick
- In the blue region
- A few centimeter above the flame

## 3: Which color is not part of the rainbow?

- Yellow
- White
- Red
- Blue

## 4: How does a printer produce different colors?

- The colors are already mixed in the cartridge
- The printer mixes the colors itself
- Through tiny colored dots close together
- The colors are mixed on the paper

## 5: Order from largest to smallest according to size:

- Diameter of a hair > bacterium > virus
- Virus > Durchmesser eines Haares > bacterium
- Diameter of a hair > virus > bacterium
- Bacterium > diameter of a hair > virus

## 6: If you turn a magnifying glass around and look through the other side, the image is...

- Smaller than before
- As big as before
- As big as before, but mirrored
- Smaller than before and mirrored

## 7: At least how many lenses do you need for a microscope?

- 1
- 2
- 3
- 4

8. In the picture you can see a microscope. Connect the terms with the corresponding parts on the microscope. If you can think of more terms, label them.

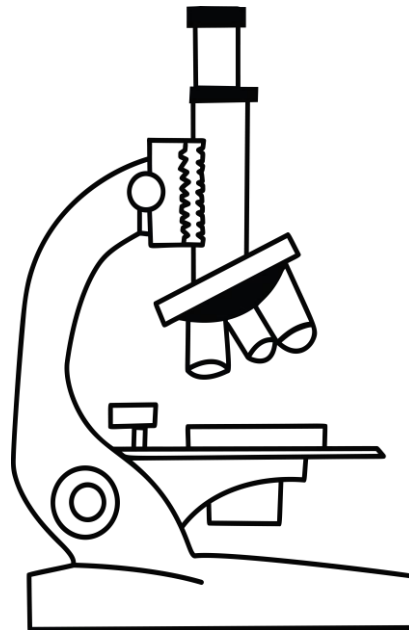

Objective

Light source

Ocular

Sample

9: What do you change, when you focus a microscope?

- |                                                                           |                                                                            |
|---------------------------------------------------------------------------|----------------------------------------------------------------------------|
| <input type="checkbox"/> The distance from the source to the sample       | <input type="checkbox"/> The distance between the sample and the objective |
| <input type="checkbox"/> The distance between the ocular and the observer | <input type="checkbox"/> The light intensity                               |

10: When you look through a microscope, the image is ...

- |                                                             |                                                            |
|-------------------------------------------------------------|------------------------------------------------------------|
| <input type="checkbox"/> Mirrored left/right                | <input type="checkbox"/> Mirrored top/bottom               |
| <input type="checkbox"/> Mirrored left/right and top/bottom | <input type="checkbox"/> Oriented the same as the original |

Draw the letter P as you would see it through a microscope:

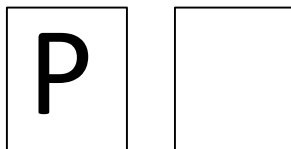

Supplement: Supplementary file [file media-12.pdf]
