# Supplementary material for: Designing a high-resolution, LEGO-based microscope for an educational setting
Source: bioRxiv or medRxiv preprint supplement (doi:10.1101/2021.04.11.439311), 2021-04-11
Supplement: Supplementary file [file media-10.pdf]

## Parts List for Mikroskop\_plan.mpd (287 parts)

| Part                                                                                     | Color                              | Quantity | Description                             |
|------------------------------------------------------------------------------------------|------------------------------------|----------|-----------------------------------------|
|  11833  | 15: White <input type="checkbox"/> | 2        | Plate 4 x 4 Round with 2 x 2 Round Hole |
|  2357   | 15: White <input type="checkbox"/> | 4        | Brick 2 x 2 Corner                      |
|  2420   | 15: White <input type="checkbox"/> | 8        | Plate 2 x 2 Corner                      |
|  2431   | 15: White <input type="checkbox"/> | 1        | Tile 1 x 4 with Groove                  |
|  2445   | 15: White <input type="checkbox"/> | 2        | Plate 2 x 12                            |
|  2456   | 15: White <input type="checkbox"/> | 22       | Brick 2 x 6                             |
|  2653   | 15: White <input type="checkbox"/> | 2        | Brick 1 x 4 with Groove                 |
|  3001   | 15: White <input type="checkbox"/> | 99       | Brick 2 x 4                             |
|  3002  | 15: White <input type="checkbox"/> | 6        | Brick 2 x 3                             |
|  3003 | 15: White <input type="checkbox"/> | 10       | Brick 2 x 2                             |
|  3004 | 15: White <input type="checkbox"/> | 4        | Brick 1 x 2                             |
|  3006 | 15: White <input type="checkbox"/> | 1        | Brick 2 x 10                            |
|  3007 | 15: White <input type="checkbox"/> | 7        | Brick 2 x 8                             |
|  3008 | 15: White <input type="checkbox"/> | 4        | Brick 1 x 8                             |
|  3009 | 15: White <input type="checkbox"/> | 10       | Brick 1 x 6                             |
|  3010 | 15: White <input type="checkbox"/> | 10       | Brick 1 x 4                             |
|  3020 | 15: White <input type="checkbox"/> | 11       | Plate 2 x 4                             |
|  3021 | 15: White <input type="checkbox"/> | 1        | Plate 2 x 3                             |
|  3022 | 15: White <input type="checkbox"/> | 6        | Plate 2 x 2                             |
|  3023 | 15: White <input type="checkbox"/> | 8        | Plate 1 x 2                             |
|  3028 | 15: White <input type="checkbox"/> | 1        | Plate 6 x 12                            |

|                                                                                     |       |                                              |   |                                                            |
|-------------------------------------------------------------------------------------|-------|----------------------------------------------|---|------------------------------------------------------------|
|     | 3033  | 15: White <input type="checkbox"/>           | 1 | Plate 6 x 10                                               |
|    | 3069b | 15: White <input type="checkbox"/>           | 4 | Tile 1 x 2 with Groove                                     |
|    | 32174 | 15: White <input type="checkbox"/>           | 1 | Constraction Connector 3 x 2 with Single Round Ball Socket |
|    | 32269 | 15: White <input type="checkbox"/>           | 1 | Technic Gear 20 Tooth Double Bevel                         |
|    | 3456  | 0: Black <input checked="" type="checkbox"/> | 2 | Plate 6 x 14                                               |
|    | 3460  | 15: White <input type="checkbox"/>           | 2 | Plate 1 x 8                                                |
|    | 3666  | 15: White <input type="checkbox"/>           | 3 | Plate 1 x 6                                                |
|    | 3701  | 15: White <input type="checkbox"/>           | 2 | Technic Brick 1 x 4 with Holes                             |
|    | 3708  | 0: Black <input checked="" type="checkbox"/> | 1 | Technic Axle 12                                            |
|    | 3708  | 15: White <input type="checkbox"/>           | 4 | Technic Axle 12                                            |
|   | 3710  | 15: White <input type="checkbox"/>           | 6 | Plate 1 x 4                                                |
|  | 3743  | 0: Black <input checked="" type="checkbox"/> | 2 | Technic Gear Rack 1 x 4                                    |
|  | 3941  | 15: White <input type="checkbox"/>           | 4 | Brick 2 x 2 Round                                          |
|  | 4265a | 0: Black <input checked="" type="checkbox"/> | 2 | Technic Bush 1/2 Type 1                                    |
|  | 44728 | 15: White <input type="checkbox"/>           | 3 | Bracket 1 x 2 - 2 x 2                                      |
|  | 4510  | 15: White <input type="checkbox"/>           | 2 | Plate 1 x 8 with Door Rail                                 |
|  | 4716  | 0: Black <input checked="" type="checkbox"/> | 3 | Technic Worm Gear                                          |
|  | 4742  | 15: White <input type="checkbox"/>           | 1 | Cone 4 x 4 x 2 Hollow No Studs                             |
|  | 55013 | 15: White <input type="checkbox"/>           | 1 | Technic Axle 8 with Stop                                   |
|  | 57909 | 15: White <input type="checkbox"/>           | 1 | Brick 2 x 2 with Ball Joint and Axlehole                   |
|  | 60219 | 15: White <input type="checkbox"/>           | 1 | Slope Brick 45 6 x 4 Double Inverted with Centre Holes     |
|  | 6143  | 15: White <input type="checkbox"/>           | 4 | Brick 2 x 2 Round Type 2                                   |
|  | 63864 | 15: White <input type="checkbox"/>           | 2 | Tile 1 x 3 with Groove                                     |

|                                                                                   |       |                                    |   |                                    |
|-----------------------------------------------------------------------------------|-------|------------------------------------|---|------------------------------------|
|   | 6636  | 15: White <input type="checkbox"/> | 3 | Tile 1 x 6                         |
|  | 87079 | 15: White <input type="checkbox"/> | 2 | Tile 2 x 4 with Groove             |
|  | 99207 | 15: White <input type="checkbox"/> | 7 | Bracket 1 x 2 - 2 x 2 Up           |
|  | 99780 | 15: White <input type="checkbox"/> | 1 | Bracket 1 x 2 - 1 x 2 Up           |
|  | 99781 | 15: White <input type="checkbox"/> | 1 | Bracket 1 x 2 - 1 x 2 Down         |
|  | u9158 | 15: White <input type="checkbox"/> | 1 | Electric Light Brick 2 x 3 x 1.333 |

This parts list was generated by [LDView](#).
